# Supplementary material for: Reconstruction of Protein-Protein Interaction Network of Insulin Signaling inHomo Sapiens
Source: Hindawi journal article supplement (doi:10.1155/2010/690925), 2010-01-01
Supplement: f1 [file 690925.f1.xls]

## Sheet: Process
AHSG	GO:0050766	positive regulation of phagocytosis
	GO:0006953	acute-phase response
	GO:0046627	negative regulation of insulin receptor signaling pathway
	GO:0030500	regulation of bone mineralization
	GO:0006907	pinocytosis
	GO:0050727	regulation of inflammatory response
	GO:0030502	negative regulation of bone mineralization
	GO:0001501	skeletal system development
AKT1	GO:0045429	positive regulation of nitric oxide biosynthetic process
	GO:0070141	response to UV-A
	GO:0007165	signal transduction
	GO:0008633	activation of pro-apoptotic gene products
	GO:0005977	glycogen metabolic process
	GO:0006915	apoptosis
	GO:0034405	response to fluid shear stress
	GO:0031999	negative regulation of fatty acid beta-oxidation
	GO:0046889	positive regulation of lipid biosynthetic process
	GO:0005979	regulation of glycogen biosynthetic process
	GO:0007281	germ cell development
	GO:0032436	positive regulation of proteasomal ubiquitin-dependent protein catabolic process
AKT2	GO:0006468	protein amino acid phosphorylation
	GO:0046328	regulation of JNK cascade
	GO:0006468	protein amino acid phosphorylation
	GO:0006464	protein modification process
	GO:0045725	positive regulation of glycogen biosynthetic process
	GO:0010748	negative regulation of plasma membrane long-chain fatty acid transport
	GO:0032869	cellular response to insulin stimulus
AP3S1	GO:0006810	transport
	GO:0016192	vesicle-mediated transport
	GO:0015031	protein transport
	GO:0008286	insulin receptor signaling pathway
	GO:0006886	intracellular protein transport
BAIAP2	GO:0007409	axonogenesis
	GO:0008286	insulin receptor signaling pathway
	GO:0046847	filopodium assembly
	GO:0007165	signal transduction
BCAR1	GO:0050851	antigen receptor-mediated signaling pathway
	GO:0007186	G-protein coupled receptor protein signaling pathway
	GO:0007173	epidermal growth factor receptor signaling pathway
	GO:0007015	actin filament organization
	GO:0051301	cell division
	GO:0042981	regulation of apoptosis
	GO:0007229	integrin-mediated signaling pathway
CILP	GO:0043569	negative regulation of insulin-like growth factor receptor signaling pathway
ENPP1	GO:0031953	negative regulation of protein amino acid autophosphorylation
	GO:0045719	negative regulation of glycogen biosynthetic process
	GO:0032869	cellular response to insulin stimulus
	GO:0030308	negative regulation of cell growth
	GO:0045599	negative regulation of fat cell differentiation
	GO:0008152	metabolic process
	GO:0050427	3'-phosphoadenosine 5'-phosphosulfate metabolic process
	GO:0046325	negative regulation of glucose import
	GO:0008152	metabolic process
	GO:0006955	immune response
	GO:0046849	bone remodeling
	GO:0032869	cellular response to insulin stimulus
FOXO4	GO:0006350	cellular transcription
	GO:0000080	G1 phase of mitotic cell cycle
	GO:0045449	regulation of cellular transcription
	GO:0006355	regulation of cellular transcription, DNA-dependent
	GO:0007517	muscle organ development
	GO:0008286	insulin receptor signaling pathway
	GO:0051151	negative regulation of smooth muscle cell differentiation
	GO:0030154	cell differentiation
	GO:0006366	transcription from RNA polymerase II promoter
	GO:0007275	multicellular organismal development
	GO:0007050	cell cycle arrest
	GO:0008285	negative regulation of cell proliferation
GAB1	GO:0007173	epidermal growth factor receptor signaling pathway
	GO:0008283	cell proliferation
	GO:0008286	insulin receptor signaling pathway
GRB2	GO:0044419	interspecies interaction between organisms
	GO:0000165	MAPKKK cascade
GRB10	GO:0007267	cell-cell signaling
	GO:0046627	negative regulation of insulin receptor signaling pathway
	GO:0045719	negative regulation of glycogen biosynthetic process
	GO:0007165	signal transduction
	GO:0042327	positive regulation of phosphorylation
	GO:0008286	insulin receptor signaling pathway
	GO:0046325	negative regulation of glucose import
	GO:0048009	insulin-like growth factor receptor signaling pathway
	GO:0032868	response to insulin stimulus
	GO:0046325	negative regulation of glucose import
	GO:0046627	negative regulation of insulin receptor signaling pathway
IGFBP5	GO:0030336	negative regulation of cell migration
	GO:0007242	intracellular signaling cascade
	GO:0048662	negative regulation of smooth muscle cell proliferation
	GO:0048630	skeletal muscle tissue growth
	GO:0007165	signal transduction
	GO:0017148	negative regulation of translation
	GO:0043569	negative regulation of insulin-like growth factor receptor signaling pathway
	GO:0001558	regulation of cell growth
	GO:0014912	negative regulation of smooth muscle cell migration
	GO:0001649	osteoblast differentiation
IGF1	GO:0009441	glycolate metabolic process
	GO:0006928	cellular component movement
	GO:0007265	Ras protein signal transduction
	GO:0030166	proteoglycan biosynthetic process
	GO:0033143	regulation of steroid hormone receptor signaling pathway
	GO:0007517	muscle organ development
	GO:0006260	cellular DNA replication
	GO:0008284	positive regulation of cell proliferation
	GO:0001501	skeletal system development
	GO:0007165	signal transduction
IGF1R	GO:0051262	protein tetramerization
	GO:0030238	male sex determination
	GO:0046777	protein amino acid autophosphorylation
	GO:0007409	axonogenesis
	GO:0006468	protein amino acid phosphorylation
	GO:0008286	insulin receptor signaling pathway
	GO:0006955	immune response
	GO:0046777	protein amino acid autophosphorylation
IGF2	GO:0001503	ossification
	GO:0051897	positive regulation of protein kinase B signaling cascade
	GO:0051781	positive regulation of cell division
	GO:0008284	positive regulation of cell proliferation
	GO:0007275	multicellular organismal development
	GO:0001649	osteoblast differentiation
	GO:0046628	positive regulation of insulin receptor signaling pathway
	GO:0001501	skeletal system development
	GO:0006006	glucose metabolic process
	GO:0005975	carbohydrate metabolic process
	GO:0043410	positive regulation of MAPKKK cascade
	GO:0045840	positive regulation of mitosis
	GO:0006349	regulation of gene expression by genetic imprinting
	GO:0032583	regulation of gene-specific transcription
IGF2R	GO:0042981	regulation of apoptosis
INS	GO:0060267	positive regulation of respiratory burst
	GO:0045740	positive regulation of DNA replication
	GO:0007186	G-protein coupled receptor protein signaling pathway
	GO:0006953	acute-phase response
	GO:0042593	glucose homeostasis
	GO:0045818	negative regulation of glycogen catabolic process
	GO:0045725	positive regulation of glycogen biosynthetic process
	GO:0008284	positive regulation of cell proliferation
	GO:0005975	carbohydrate metabolic process
	GO:0008219	cell death
	GO:0031954	positive regulation of protein amino acid autophosphorylation
	GO:0051897	positive regulation of protein kinase B signaling cascade
	GO:0046326	positive regulation of glucose import
	GO:0045730	respiratory burst
	GO:0050709	negative regulation of protein secretion
	GO:0045721	negative regulation of gluconeogenesis
	GO:0050715	positive regulation of cytokine secretion
	GO:0055089	fatty acid homeostasis
	GO:0043410	positive regulation of MAPKKK cascade
	GO:0046628	positive regulation of insulin receptor signaling pathway
	GO:0045922	negative regulation of fatty acid metabolic process
	GO:0045821	positive regulation of glycolysis
INSR	GO:0045740	positive regulation of DNA replication
	GO:0045995	regulation of embryonic development
	GO:0045821	positive regulation of glycolysis
	GO:0046777	protein amino acid autophosphorylation
	GO:0008286	insulin receptor signaling pathway
	GO:0007169	transmembrane receptor protein tyrosine kinase signaling pathway
	GO:0046777	protein amino acid autophosphorylation
	GO:0018108	peptidyl-tyrosine phosphorylation
	GO:0006468	protein amino acid phosphorylation
	GO:0032147	activation of protein kinase activity
IRS1	GO:0045725	positive regulation of glycogen biosynthetic process
	GO:0046628	positive regulation of insulin receptor signaling pathway
	GO:0008286	insulin receptor signaling pathway
	GO:0043552	positive regulation of phosphoinositide 3-kinase activity
	GO:0032000	positive regulation of fatty acid beta-oxidation
	GO:0032869	cellular response to insulin stimulus
	GO:0030879	mammary gland development
	GO:0046627	negative regulation of insulin receptor signaling pathway
	GO:0045725	positive regulation of glycogen biosynthetic process
	GO:0010907	positive regulation of glucose metabolic process
	GO:0046676	negative regulation of insulin secretion
	GO:0008286	insulin receptor signaling pathway
	GO:0008284	positive regulation of cell proliferation
	GO:0051291	protein heterooligomerization
IRS2	GO:0010748	negative regulation of plasma membrane long-chain fatty acid transport
	GO:0002903	negative regulation of B cell apoptosis
	GO:0030879	mammary gland development
	GO:0032869	cellular response to insulin stimulus
	GO:0045725	positive regulation of glycogen biosynthetic process
	GO:0008283	cell proliferation
	GO:0019216	regulation of lipid metabolic process
	GO:0002053	positive regulation of mesenchymal cell proliferation
	GO:0043434	response to peptide hormone stimulus
	GO:0007165	signal transduction
	GO:0045725	positive regulation of glycogen biosynthetic process
	GO:0007420	brain development
	GO:0008286	insulin receptor signaling pathway
	GO:0032024	positive regulation of insulin secretion
	GO:0030335	positive regulation of cell migration
PDPK1	GO:0032148	activation of protein kinase B activity
	GO:0006972	hyperosmotic response
	GO:0048041	focal adhesion assembly
PHIP	GO:0008286	insulin receptor signaling pathway
PIK3R1	GO:0007165	signal transduction
	GO:0090004	positive regulation of establishment of protein localization in plasma membrane
PIK3R3	GO:0008286	insulin receptor signaling pathway
SIK2	GO:0006468	protein amino acid phosphorylation
	GO:0007243	protein kinase cascade
	GO:0006468	protein amino acid phosphorylation
	GO:0007243	protein kinase cascade
SLC2A4	GO:0015758	glucose transport
	GO:0008643	carbohydrate transport
	GO:0046323	glucose import
	GO:0006810	transport
SOCS1	GO:0001932	regulation of protein amino acid phosphorylation
	GO:0009968	negative regulation of signal transduction
	GO:0007242	intracellular signaling cascade
	GO:0034097	response to cytokine stimulus
	GO:0046426	negative regulation of JAK-STAT cascade
	GO:0040008	regulation of growth
	GO:0042518	negative regulation of tyrosine phosphorylation of Stat3 protein
	GO:0046627	negative regulation of insulin receptor signaling pathway
	GO:0042518	negative regulation of tyrosine phosphorylation of Stat3 protein
	GO:0046627	negative regulation of insulin receptor signaling pathway
	GO:0007259	JAK-STAT cascade
	GO:0046426	negative regulation of JAK-STAT cascade
	GO:0043434	response to peptide hormone stimulus
	GO:0019941	modification-dependent protein catabolic process
	GO:0045444	fat cell differentiation
	GO:0031100	organ regeneration
	GO:0001932	regulation of protein amino acid phosphorylation
	GO:0046426	negative regulation of JAK-STAT cascade
SORBS1	GO:0008286	insulin receptor signaling pathway
	GO:0015758	glucose transport
	GO:0048041	focal adhesion assembly
	GO:0032869	cellular response to insulin stimulus
	GO:0006936	muscle contraction
	GO:0046326	positive regulation of glucose import
TSC2	GO:0032007	negative regulation of TOR signaling pathway
	GO:0043491	protein kinase B signaling cascade
	GO:0045184	establishment of protein localization
	GO:0048009	insulin-like growth factor receptor signaling pathway
	GO:0043547	positive regulation of GTPase activity
	GO:0051898	negative regulation of protein kinase B signaling cascade
	GO:0007507	heart development
	GO:0030030	cell projection organization
	GO:0051291	protein heterooligomerization

## Sheet: Function
AHSG	GO:0004869	cysteine-type endopeptidase inhibitor activity
	GO:0005515	protein binding
	GO:0019210	kinase inhibitor activity
AKT1	GO:0004672	protein kinase activity
	GO:0005515	protein binding
	GO:0004674	protein serine/threonine kinase activity
	GO:0016301	kinase activity
	GO:0005524	ATP binding
AKT2	GO:0005515	protein binding
	GO:0005524	ATP binding
	GO:0004674	protein serine/threonine kinase activity
	GO:0005524	ATP binding
	GO:0004672	protein kinase activity
AP3S1	GO:0005515	protein binding
	GO:0005215	transporter activity
	GO:0008565	protein transporter activity
BAIAP2	GO:0005515	protein binding
	GO:0008093	cytoskeletal adaptor activity
	GO:0008022	protein C-terminus binding
	GO:0005515	protein binding
	GO:0017124	SH3 domain binding
BCAR1	GO:0005515	protein binding
	GO:0019901	protein kinase binding
	GO:0017124	SH3 domain binding
	GO:0004871	signal transducer activity
CILP	GO:0004551	nucleotide diphosphatase activity
	GO:0004035	alkaline phosphatase activity
ENPP1	GO:0003824	catalytic activity
	GO:0005044	scavenger receptor activity
	GO:0030247	polysaccharide binding
	GO:0005158	insulin receptor binding
	GO:0005524	ATP binding
	GO:0003824	catalytic activity
	GO:0004528	phosphodiesterase I activity
	GO:0003824	catalytic activity
	GO:0004551	nucleotide diphosphatase activity
FOXO4	GO:0003700	transcription factor activity
	GO:0003677	DNA binding
	GO:0019899	enzyme binding
	GO:0005515	protein binding
	GO:0043565	sequence-specific DNA binding
	GO:0008134	transcription factor binding
	GO:0003700	transcription factor activity
	GO:0003677	DNA binding
GAB1	GO:0005515	protein binding
	GO:0005070	SH3/SH2 adaptor activity
GRB2	GO:0005515	protein binding
GRB10	GO:0005158	insulin receptor binding
	GO:0005515	protein binding
	GO:0005070	SH3/SH2 adaptor activity
IGFBP5	GO:0005520	insulin-like growth factor binding
	GO:0005515	protein binding
	GO:0019838	growth factor binding
IGF1	GO:0008083	growth factor activity
	GO:0005159	insulin-like growth factor receptor binding
	GO:0005179	hormone activity
IGF1R	GO:0004714	transmembrane receptor protein tyrosine kinase activity
	GO:0004872	receptor activity
	GO:0005010	insulin-like growth factor receptor activity
	GO:0005524	ATP binding
	GO:0005520	insulin-like growth factor binding
	GO:0005515	protein binding
	GO:0005520	insulin-like growth factor binding
	GO:0005158	insulin receptor binding
IGF2	GO:0008083	growth factor activity
	GO:0005515	protein binding
	GO:0005179	hormone activity
	GO:0005515	protein binding
	GO:0005159	insulin-like growth factor receptor binding
IGF2R	GO:0031995	insulin-like growth factor II binding
	GO:0004872	receptor activity
	GO:0001965	G-protein alpha-subunit binding
	GO:0019899	enzyme binding
	GO:0001948	glycoprotein binding
	GO:0005520	insulin-like growth factor binding
	GO:0005537	mannose binding
INS	GO:0005179	hormone activity
INSR	GO:0005515	protein binding
	GO:0005524	ATP binding
	GO:0004714	transmembrane receptor protein tyrosine kinase activity
	GO:0031995	insulin-like growth factor II binding
	GO:0043560	insulin receptor substrate binding
	GO:0051425	PTB domain binding
	GO:0004713	protein tyrosine kinase activity
IRS1	GO:0005158	insulin receptor binding
	GO:0005080	protein kinase C binding
	GO:0042169	SH2 domain binding
	GO:0004871	signal transducer activity
	GO:0043548	phosphoinositide 3-kinase binding
	GO:0005515	protein binding
IRS2	GO:0019903	protein phosphatase binding
	GO:0004871	signal transducer activity
	GO:0005158	insulin receptor binding
	GO:0019904	protein domain specific binding
	GO:0005515	protein binding
	GO:0019901	protein kinase binding
PDPK1	GO:0005515	protein binding
	GO:0004674	protein serine/threonine kinase activity
	GO:0004672	protein kinase activity
	GO:0005524	ATP binding
PHIP	GO:0005515	protein binding
	GO:0005158	insulin receptor binding
PIK3R1	GO:0005515	protein binding
	GO:0005158	insulin receptor binding
PIK3R3	GO:0005515	protein binding
	GO:0035014	phosphoinositide 3-kinase regulator activity
	GO:0016303	1-phosphatidylinositol-3-kinase activity
SIK2	GO:0005524	ATP binding
	GO:0004674	protein serine/threonine kinase activity
	GO:0004672	protein kinase activity
	GO:0016740	transferase activity
	GO:0000287	magnesium ion binding
	GO:0000166	nucleotide binding
SLC2A4	GO:0005515	protein binding
	GO:0055056	D-glucose transmembrane transporter activity
	GO:0005215	transporter activity
	GO:0005355	glucose transmembrane transporter activity
SOCS1	GO:0004860	protein kinase inhibitor activity
	GO:0019210	kinase inhibitor activity
	GO:0005159	insulin-like growth factor receptor binding
	GO:0005515	protein binding
	GO:0019210	kinase inhibitor activity
	GO:0019901	protein kinase binding
SORBS1	GO:0005070	SH3/SH2 adaptor activity
	GO:0005515	protein binding
	GO:0008092	cytoskeletal protein binding
TSC2	GO:0005515	protein binding
	GO:0005488	binding
	GO:0046982	protein heterodimerization activity

## Sheet: Component
AHSG	GO:0005576	extracellular region
	GO:0005615	extracellular space
AKT1	GO:0005829	cytosol
	GO:0005737	cytoplasm
	GO:0005886	plasma membrane
	GO:0005737	cytoplasm
	GO:0005819	spindle
AKT2	GO:0005792	microsome
	GO:0032593	insulin-responsive compartment
	GO:0005829	cytosol
	GO:0030027	lamellipodium
AP3S1	GO:0030119	AP-type membrane coat adaptor complex
	GO:0030117	membrane coat
	GO:0030659	cytoplasmic vesicle membrane
	GO:0005794	Golgi apparatus
	GO:0030133	transport vesicle
	GO:0016020	membrane
	GO:0031410	cytoplasmic vesicle
BAIAP2	GO:0016020	membrane
	GO:0030175	filopodium
	GO:0005886	plasma membrane
	GO:0005737	cytoplasm
	GO:0042995	cell projection
	GO:0016020	membrane
	GO:0001726	ruffle
	GO:0005737	cytoplasm
BCAR1	GO:0005737	cytoplasm
	GO:0001726	ruffle
	GO:0005925	focal adhesion
	GO:0005624	membrane fraction
CILP	GO:0005615	extracellular space
	GO:0005576	extracellular region
	GO:0044420	extracellular matrix part
	GO:0005578	proteinaceous extracellular matrix
ENPP1	GO:0009986	cell surface
	GO:0016323	basolateral plasma membrane
FOXO4	GO:0005634	nucleus
	GO:0005737	cytoplasm
	GO:0005829	cytosol
GAB1	GO:0005829	cytosol
GRB2	GO:0005829	cytosol
GRB10	GO:0005737	cytoplasm
	GO:0005886	plasma membrane
IGFBP5	GO:0005576	extracellular region
	GO:0016942	insulin-like growth factor binding protein complex
IGF1	GO:0005576	extracellular region
	GO:0031093	platelet alpha granule lumen
IGF1R	GO:0016020	membrane
	GO:0043005	neuron projection
	GO:0005887	integral to plasma membrane
IGF2	GO:0005576	extracellular region
	GO:0005615	extracellular space
IGF2R	GO:0005641	nuclear envelope lumen
	GO:0005624	membrane fraction
	GO:0016020	membrane
	GO:0005634	nucleus
INS	GO:0005615	extracellular space
INSR	GO:0016020	membrane
	GO:0016021	integral to membrane
IRS1	GO:0005634	nucleus
	GO:0005737	cytoplasm
IRS2	GO:0005886	plasma membrane
PDPK1	GO:0005829	cytosol
	GO:0005737	cytoplasm
	GO:0005886	plasma membrane
PHIP	GO:0005575	cellular_component
PIK3R1	GO:0005829	cytosol
	GO:0005943	1-phosphatidylinositol-4-phosphate 3-kinase, class IA complex
PIK3R3	GO:0005942	phosphoinositide 3-kinase complex
SIK2	GO:0005737	cytoplasm
SLC2A4	GO:0032593	insulin-responsive compartment
	GO:0009897	external side of plasma membrane
	GO:0016021	integral to membrane
	GO:0005737	cytoplasm
	GO:0016020	membrane
	GO:0005768	endosome
	GO:0005887	integral to plasma membrane
	GO:0012506	vesicle membrane
	GO:0000299	integral to membrane of membrane fraction
	GO:0005905	coated pit
	GO:0005624	membrane fraction
	GO:0048471	perinuclear region of cytoplasm
	GO:0016020	membrane
	GO:0042383	sarcolemma
SOCS1	GO:0005737	cytoplasm
SORBS1	GO:0005915	zonula adherens
	GO:0005913	cell-cell adherens junction
	GO:0016020	membrane
	GO:0005912	adherens junction
	GO:0005737	cytoplasm
	GO:0005634	nucleus
	GO:0005829	cytosol
	GO:0005886	plasma membrane
	GO:0001725	stress fiber
TSC2	GO:0005792	microsome
	GO:0005622	intracellular
	GO:0016020	membrane
	GO:0033596	TSC1-TSC2 complex
	GO:0005624	membrane fraction
	GO:0005829	cytosol
	GO:0005737	cytoplasm
	GO:0048471	perinuclear region of cytoplasm

## Sheet: 3056 proteins
AR	FOXO1
RXRG	PPARA
HLA-A	COPB1
RAB26	RIMS1
NOTCH2	RBPJ
TADA2L	EXOC8
TP53BP1	E2F1
LEP	STAT3
HNRNPUL1	PRMT2
PMF1	GDF9
MAP3K13	MAP3K13
CNTFR	IL6ST
GAK	CDK5
ELL	SNF8
PIK3C2B	SHC1
CSF1R	CSF1
BCAR1	DOCK1
LYN	PAG1
RELA	FOS
GNAQ	PIK3CA
PIK3R3	IRS1
LDOC1	AEBP2
WDR48	UBR5
IL6R	IL6ST
TNFAIP3	TBK1
TGIF2	SMAD3
GRK1	RHO
RINT1	ZW10
MAP3K1	DVL2
AHR	NR2F1
RELA	IRF2
PIK3CD	PIK3CG
KRT20	EXOC8
SOCS1	KIT
BIRC7	CASP3
RAB6A	DCTN1
MYC	MYBBP1A
BIRC7	CASP7
RPS6KB1	EEF2K
ZIC2	RNF180
PSEN2	FLNB
SELS	DERL1
E2F1	PHB
ELL	TP53
DNMBP	NCKAP1
MRE11A	NBN
SAP18	DDOST
ITK	SRC
MAPK14	RPS6KA5
SFN	PTPN2
IQGAP1	RAC1
BTK	BTK
RAD9A	CLSPN
MAPK14	RPS6KA3
MDFI	ZNF679
PTPRF	RET
IRF3	PRDX1
COPG	COPE
VDR	RUNX1
NOTCH1	LEF1
SUV39H1	DNMT3A
SNX4	INSR
GRK5	GRK5
ZFP64	TLE1
SOS2	SHC1
NR2F1	NCOA3
FOXO4	MDM2
PAM	TSC2
PSTPIP1	ABL1
SRPK2	LUC7L3
TRAF2	HINFP
ARHGEF1	GNA12
RGS3	GNA11
EP300	RORA
RELA	IRF9
MTNR1A	GNAI2
MED17	BARD1
MTNR1A	GNAI3
SYTL3	RAB10
STK24	PPP2CA
HNF1A	STAT3
EN2	FOXA2
TNFAIP3	MCM6
CTNNB1	CEBPA
DVL2	RHOXF2
BCL2	BCL2L11
ARRB1	GNMT
UTRN	DTNA
CD3E	PIK3R1
TRAF2	TRAF1
PECAM1	PTPN11
TRAF2	TRAF2
YWHAE	NGFRAP1
KCNIP3	CREB1
TAF1B	UBTF
CALM1	GRK4
CALM1	GRK5
BCR	PIK3CG
TRIB3	GDF9
RAB3C	RPH3A
CD1D	CALR
SMARCA2	ESR1
STAM2	TYK2
MED28	MED28
MED28	MED27
CASP6	CASP6
UQCRC1	UQCRC2
NEK8	CSN2
SMAD2	HDAC1
ORC1L	MCM7
VHL	CNTF
BMPR2	BMPR1A
BMPR2	BMPR1B
NCK1	PKN2
STAT3	PIAS3
RIT2	RLF
CTNNB1	ESR1
ORC1L	MCM2
MED28	MED30
MED28	MED31
SMAD3	RUNX1
JUN	UBE2I
GRM7	GNAQ
IKZF3	HDAC2
ETS1	DAXX
TRAF2	TRADD
EP300	TDG
MAP2K5	MAP2K5
IKZF3	HDAC5
IKZF3	HDAC4
RARA	NCOA2
SP1	SUMO1
RBM8A	NXF1
IKZF2	IKZF2
IKZF2	IKZF1
RARA	NCOA6
IKZF2	IKZF3
NMI	HGS
SAP30	ING1
RFWD2	DDB1
SMAD3	RUNX3
KDM1	HMG20B
SMAD3	RUNX2
PSMA1	TSC22D4
RBBP5	ASH2L
TP53	TAF1C
TAF10	SNAPC4
TP53	TAF1A
BACH1	PATZ1
TP53	TAF1B
PRKCA	TIAM1
MAP2K1	GRB10
AVEN	APAF1
HDAC2	RBBP7
MAGED1	SMC3
CASP9	XIAP
CENPH	CENPH
SNRK	STK16
CBL	PLCG1
MAFG	VIM
CDC25A	RAF1
PRKCA	PICK1
TUBB2C	DLST
CREBBP	CITED2
ERC1	RAB6B
SNX17	LRP8
CREBBP	CITED1
USF1	GTF2I
MYST2	AR
HNRNPK	UBE2I
INSR	RASA1
AP1S1	AP1G2
FGF1	FGFR4
HOXA9	SMAD4
ADORA2A	DRD2
RPAP1	ERBB2IP
LMO2	MLLT4
FGF1	FGFR1
FGF1	FGFR2
RPAP1	HSPA8
LCP2	PLCG1
COPS6	KLHL20
JAK1	IL9R
PKD1	PKD2
BUB1	HDAC1
DUSP6	MAPK3
DUSP6	MAPK1
FER	EGFR
ING1	ACTL6A
YWHAZ	VIM
EPS15	EGFR
EWSR1	RASL11B
MED28	MED22
MED28	MED21
MED28	MED20
MED28	MED24
AP3B1	ARF6
LRP1	PLAUR
AP3B1	ARF5
RICS	RHOA
MYOT	FLNA
NOTCH1	RBPJ
CDK9	TUBB2C
GTF2H2	CCNH
HAND1	HEY2
MKNK1	MAPK1
BAK1	BCL2L1
CASP3	NDUFS1
MED28	MED16
CREBBP	CSK
MED28	MED17
BLNK	GRB2
RYK	EPHB3
RYK	EPHB2
MED28	MED11
NEK6	DYNLL1
MED28	MED13
RIPK2	IKBKG
MED28	MED12
MED28	MED15
HCK	PECAM1
MAPK8	TNFRSF1A
CDK2AP1	AMY1A
MED28	MED14
USO1	SEC22A
CAP1	CAP2
CDKN1C	CCND1
EFNA2	EPHA7
CAP1	CAP1
TK1	SETDB1
FEN1	HUS1
ARID1B	SMARCA2
SHANK2	MYO5A
ARID1B	SMARCA4
PHOX2A	PHOX2A
TP53	HSP90AA1
CSF1R	SRC
RALBP1	GTF3A
RB1	TBP
BCL6	PML
CBLB	SH3KBP1
FLT1	PLCG1
CHUK	CUL1
MYCBP	SSRP1
STAT6	CREBBP
INPPL1	SORBS1
ZNF197	TRIM28
UBA3	NAE1
ITK	KHDRBS1
MAPK8IP1	MAPK8
HLA-B	RUVBL1
PPARA	FABP1
SMAD4	ATF2
NUP37	NUP85
BNIP3L	EWSR1
SPOP	RTN3
MDM2	TBP
NFKB2	MEN1
PEG10	SIAH2
RPAP1	IGF2BP1
NOV	IGF2
EGFR	GAB1
NOV	IGF1
STAT2	SMARCA4
RAD18	UBE2B
RGS18	GNAQ
JDP2	ATF2
LAT	VAV1
MED21	POLR2A
JDP2	ATF7
SMARCA4	ACTL6A
PHLPP1	RBM15
SAT1	KAT5
MTA2	MTA2
PTPN1	CAV1
ING3	TRRAP
RNF4	AR
CEBPB	RARB
HAND1	HEYL
GABRB3	PRKCA
RELA	BTRC
MCM2	TBP
SMAD4	CTNNB1
EDF1	RXRA
RUVBL2	PPP1CA
MEF2C	EP300
FBP1	FBP1
TRIM11	TRIM11
GATA1	ZFPM1
LMO2	STAT1
CDKN1B	TSC2
ETV6	ACTA1
SELS	NPLOC4
NME1	TIAM1
BAX	BAX
TRIP13	PLSCR3
STAT3	CDKN1A
CBL	SPRY4
STAT2	SMARCC1
HDAC1	TGIF1
RPAP1	HSPD1
STAT2	SMARCC2
MIS12	NDC80
MAML1	NOTCH2
MAML1	NOTCH1
GATA1	ZFPM2
MAML1	NOTCH4
MAML1	NOTCH3
DNM2	SNX9
CD44	SRC
CD79A	SYK
POU2F2	GAPDH
NFKB1	IKBKG
FGF7	HSPG2
HR	THRA
PLK1	NUDC
MPDZ	KIT
HDAC1	TGIF2
VPS18	VPS11
ILK	IGF2BP1
HDAC9	CTBP1
NBN	BLM
EPHA8	PIK3CG
TP53	HIPK2
JUN	GTF2E2
VDAC1	BCL2L1
BTRC	CUL1
MDFI	VPS72
CREM	TBP
KLF13	CREBBP
ACTN1	ZYX
NR0B1	NR5A1
NCKIPSD	DMRTB1
MAPK8	TP53
BRF2	XPO4
SHC1	PRKCD
GNAS	GNAS
BRF2	XPO7
BRF2	XPO6
AXIN2	CTNNB1
HNRNPD	SAFB
PPP2CA	PPP2R1A
UPF3B	MCRS1
EGFR	PTPN6
ARRB1	PES1
CFTR	STX1A
PARD6A	RAC1
PDLIM7	WWP2
SMAD3	PML
RBX1	HSPA8
HLA-A	CD8A
STX1A	VAMP8
STX1A	SYTL4
HDAC8	CBFA2T3
PTPN11	GAB2
EWSR1	WWP2
STX1A	VAMP1
PDLIM1	PDLIM1
EWSR1	WWP1
TIMP2	MMP14
EPHA2	PTPN11
CCNT2	CDK9
CCND1	STAT3
GNAQ	PIK3R1
IL4R	SHC1
TRIM37	TRAF5
TRIM37	TRAF4
RB1	ARID3B
BRD4	CCNT1
TRIM37	TRAF1
BRD4	CCNT2
G3BP1	NUP62
TRIM37	TRAF3
MLLT3	PTN
TRIM37	TRAF2
RPAP1	ELAVL1
TRAF2	ZNF646
TRIM24	GTF2E1
PPP2CA	PPP2R3B
NEDD9	NEDD9
ABCA1	SDHB
RB1	ARID4A
LYN	GAB2
PTPN1	LTK
SMC1A	RAD21
PIK3R1	BCAR1
TCEAL1	USP7
ABL1	PTPN6
CEBPB	RUNX1
TBL1X	TBL1XR1
FBXW11	CDC25B
EGR1	PITX1
VHL	RPS9
RING1	RYBP
MTA1	HIF1A
DFFB	TOP2A
ERCC2	GTF2H2
ERCC2	GTF2H1
PLD1	PKN1
CBLB	SHC1
ICMT	RHOA
SIAH1	SYP
LTBR	LTBR
YWHAZ	RGS3
RAF1	RRAS
USP21	UCHL1
PLCG1	SYNCRIP
NCOA3	CREBBP
CCDC85B	MEAF6
SP1	LDB1
KEAP1	SQSTM1
PPP2CA	PPP2R5C
NAPA	NSF
EREG	EGFR
BMPR2	TGFBR1
RING1	RING1
ZYX	NEDD9
MCM2	ORC4L
TRAIP	TRAF1
TP53	PIAS1
JAK2	HSPA8
PPP2CA	PPP2R5E
TRAIP	TRAF2
PPP2CA	PPP2R5D
SRF	NKX3-1
ARIH2	IL4R
SMNDC1	EWSR1
SMAD1	RUNX1
MAPK1	IER3
SMAD1	RUNX2
SMAD1	RUNX3
RRAS2	RAF1
YWHAB	MLLT4
BCL2L1	RAD9A
VCAN	FBN1
PICK1	BNC1
KAT2B	CTNNB1
SQSTM1	RIPK1
NME2	LYZ
NCOR2	SRF
TCF3	TAL1
RARA	NPAS2
UBE2I	RANGAP1
EGFR	EGFR
PICK1	GRM7
ERCC3	MNAT1
PRKACA	RASGRP3
RAB8B	VIM
RBPMS	SMUG1
PSMA3	PSMA1
BMPR2	CRYAB
ABCC8	KCNJ11
CSF1R	YES1
S100A13	FGF1
MAD2L1	CDC20
PTPRH	BCAR1
PSENEN	APH1A
BTK	CBL
BIRC2	BIRC2
TFDP1	E2F4
IKZF4	HDAC4
GSK3B	AR
NR2E3	RARA
RHOA	RIPK4
IKZF4	HDAC5
ATF6	SRF
ESR1	ESR1
VPS11	VPS33A
BLNK	CD79A
JUN	GTF2F2
AGFG1	EPS15
TRIM37	MCM10
TNFRSF1A	STAT1
MAPK14	MAP2K7
IKZF4	HDAC2
DRD4	NCK1
PLXNA1	AKT1
XPO6	ACTA1
TSG101	HGS
CHEK1	SFN
SAE1	SUMO3
IGF1	IGFALS
GSC	FOXA2
RELB	SMARCA4
NEK8	NEK8
BRCA1	UBE3A
ZAP70	LAT
E2F1	NDNL2
MIB2	ACTA1
XRCC5	PRKDC
SYK	PXN
PARD6A	PRKCZ
CCDC85B	SYTL4
PLAUR	JAK1
UBE2C	POLM
GSN	VDAC1
STK24	G3BP2
OTUB1	UBE2N
LYST	BRUNOL4
RAF1	RBL2
SAT1	EPHB6
CTBP2	MDM2
ERBB2IP	PICK1
KIN	RPA1
MDFI	ZNF607
RIT2	CALM1
PAX6	PROX1
CREBBP	GTF2B
MAPK14	DDIT3
VHL	CCDC59
PGF	VEGFA
MCM2	ORC2L
HDAC1	CTBP1
RBL1	CDKN1C
ARNTL	NPAS2
RAF1	NRAS
NF2	AGAP2
MARK2	DTNA
ILF3	GDF9
MME	LYN
ARF1	ARF1
TADA3L	SAP18
GRB14	PRKCZ
MAPK1	SREBF1
PXN	FYN
FANCC	HSPA8
TGFBR1	ENG
AKTIP	POLA2
BAG1	VDR
DUSP1	MAPK14
DUSP1	MAPK10
LCP2	PIK3R1
FGFR3	RNF130
CDH5	JUP
ORC5L	ORC6L
VTN	IGF2
RIN1	MLLT4
AP1G1	ARF1
MAPK8	BCAR1
CAV3	PDGFRA
CAV3	PDGFRB
SIM1	HSP90AA1
CRK	IRS4
HUWE1	MCL1
TP53	AIMP2
MDFI	ZNF646
MAFA	NEUROD1
NAP1L1	NAP1L1
TOLLIP	SETDB1
WDR48	POLR2I
ISL1	LMX1A
CREBBP	NFE2L2
WDR48	POLR2G
CCL5	IL8
HTT	TP53
GRB10	RAF1
FOSL1	CALCOCO1
ESR2	MED7
CCR5	STAT5B
MCM6	MCM10
SMARCA4	ACTB
ERCC3	BCR
MTNR1A	GNA11
SREBF1	CREBBP
GTF2E1	GTF2B
ESR2	MED1
LHX1	LHX3
NR1H4	NCOA1
RAB25	RAB11FIP1
RAB25	RAB11FIP3
RAB25	RAB11FIP5
NLK	LEF1
SMAD7	TGFBR2
LMX1A	TCF3
AR	FLNA
HGS	ATP1A1
SSR4	HECW1
ITGB1BP1	LRP2
BRCC3	BRCA1
ITM2B	BCL2
SFN	BCAR1
DNMT3A	ZBTB17
PLIN3	RAB9A
CDK8	CCNC
PIK3CA	RASGRP3
CSF2RB	PTPN6
NCF1	TRAF4
INSR	FRS2
HDAC5	GABARAP
NCBP1	BNIP2
TNFRSF18	TNFRSF18
NCBP1	BNIP3
ID1	TCF3
PRMT2	DMRTB1
NCBP1	BNIP1
IGFBP7	IGF2
GTF2E2	POLR2A
TNFRSF10D	LRPPRC
ADRBK1	SRC
KHDRBS1	LCK
ZBTB43	ZNF417
KLHL20	ACTA1
ATR	AP2A2
HDAC1	DZIP3
SELS	SYVN1
HSPD1	CASP3
CDK5	CDK5R1
EIF2AK2	EIF2AK2
PTPN11	GHR
ISYNA1	PPP2CA
CARD8	IKBKG
RPS6KA4	FOS
CHUK	MAP3K7
PTPN11	CSF3R
CDH5	CTNNB1
TRIB3	HLA-B
ITGB3BP	ITGB3BP
BTRC	SMAD4
LIFR	LIF
RELB	SMARCC1
RELB	SMARCC2
TP73	TP73
KPNA1	KPNB1
CDC25C	CDC2
LRP8	DLG4
BRE	LRPPRC
NGFR	CAV1
JUP	APC
EGFR	PDGFRB
HNRNPA1	RBM39
CSF1	CBL
ZBTB17	MAX
TRAF2	UBE2N
ABL1	NCK1
CTNNB1	CHUK
TNFRSF1B	CAV1
TAP1	TAP2
COL4A3BP	ITGB3BP
KAT5	MDM2
IQGAP1	PRKACA
TAOK3	TRAF2
MAP3K8	RELA
TRAF2	FAM120B
CSNK2A1	UBTF
CSNK1A1	KPNA2
CAPZB	PTN
PTPRC	GANAB
TPI1	TPI1
PPP2CA	TRIP13
PAX5	RUNX1
VTI1A	VAMP8
SOCS3	CSF1R
RFC5	COPS6
CFTR	HSPA8
IKZF1	CHD4
PTK2B	BCAR1
ABL1	TP73
PEBP1	MAPK1
LYST	ESRRA
CSNK2A1	TOP1
INSR	SOCS3
CD27	TRAF5
CD27	TRAF2
AP4B1	AP4E1
RB1	MCM7
CD27	TRAF3
POLR1E	HNRNPUL1
CCDC85B	SYT17
CDC45L	ORC1L
KIT	CD9
CD27	TRAF1
MCM7	MCM4
MCM7	MCM5
MCM7	MCM6
GSN	PIK3CA
MCM7	MCM7
PRKACA	CREB1
BRCC3	TP53
RAC1	RAC1
BTRC	APC
CSNK2A1	IRF2
RNPS1	PRPF4B
HAND2	HAND2
FUBP1	GTF2H1
XPO1	NXT1
HSPA1A	NR3C1
GTF2A1	TBPL2
DSTYK	MAD2L1
NUP43	NUP37
GMCL1	EMD
PDZK1	AKAP10
CLEC4M	CLEC4M
EGR1	CEBPB
HNRNPK	DIDO1
DVL3	ZNF408
CBLB	GRB2
BCAR1	RAPGEF1
VHL	ZNF197
CDC34	FBXW2
AP1G1	AP2S1
DTNA	DMD
NR4A1	HIF1A
MAPK10	MCL1
NOTCH3	DLL1
CARD9	BCL10
FGFR1	FGF2
MDFI	ZNF559
BUB1B	CENPE
HDAC3	VHL
AKT1	NR4A1
TOPORS	UBE2I
CREBBP	KLF4
NGF	NTRK1
RAC1	BAIAP2
CREBBP	KLF1
OTUB1	NPM1
BCR	RHOA
MCM7	MCM8
DLG4	FZD2
DLG4	FZD1
TRIP13	GLYCTK
NFKB1	LYL1
TCF3	HAND2
ZNF434	ZNF446
TRIM63	TRIM55
MDM2	SFN
DLK1	GRN
FUBP1	TLE1
SGK1	CARHSP1
TYRO3	SRC
TNPO1	NUP98
MDK	PTPRZ1
RANBP3	RAN
PARP1	PCNA
PAX6	EP300
CDKN2A	E4F1
ELF5	SIRT6
MCC	CLTC
TRIM63	TRIM63
STAT3	IL1RAP
CAMK2G	RRAD
DSCC1	RFC2
PSMC2	TBP
NBN	ATM
SLC25A4	BAX
AP1G1	AP2M1
RIT1	RLF
TAF10	TAF5L
DNMT3B	SUMO1
TNFRSF11B	TNFSF11
GADD45A	PCNA
AP2A1	RAB11FIP2
GTF2I	PRKG1
VHL	HIF1A
THRB	THRB
STK39	GSN
GZMB	SRGN
EWSR1	SF1
MDFI	ZNF581
BAZ1B	SMARCC2
TAF1	FOS
PARD3	F11R
E2F4	TFDP2
BAZ1B	SMARCC1
BAZ1A	SATB1
SMAD4	SKI
CREB3	APPBP2
PSMA3	CDKN1A
EIF4A2	ATRX
MBD1	SUV39H1
CCNH	TP53
NPHP1	PTK2B
NUP43	NUP85
ALOX12	ITGB4
GRB2	EPHA2
CDKN1B	AKT1
CBX4	CTBP1
TRAF2	CASP12
CBX4	CTBP2
UBE2I	ZNF451
PPARD	HDAC4
TCERG1	POLR2A
ZNF74	TRIM28
CBLB	ZAP70
PXN	TLN1
RAG1	KPNA2
FGFR3	KRT8
VCP	CHEK2
BCL2	PPP2CA
PPARD	HDAC3
PIAS1	STAT1
THAP1	ZNF408
JAK2	PIK3R1
M6PR	PLIN3
CHEK1	BLM
GRB2	MAP3K1
MAP3K7	HGS
TRIM24	THRA
PSMC5	PSMC3
BUB1B	ANAPC7
HDAC1	CHD1
CIITA	NCOA1
CALR	PRF1
TPR	NUP205
ERBB2	GRB2
JUN	JUN
PLCG1	RHOA
ABL1	TERF1
PTK2	DOCK1
HBP1	RBL2
STEAP3	PKMYT1
TSC2	CAV1
ABL1	TP53
DLG1	BTRC
USF1	FOSL1
TOPORS	TP53
AHR	TBP
CRK	SH3KBP1
MSTN	FSTL3
ZAP70	PAG1
M6PR	GGA3
M6PR	GGA1
M6PR	GGA2
MAF	SOX9
TAF9	DRAP1
ACTA1	DMD
INSR	CAV1
FYN	JAK2
EPOR	SYP
AXIN1	CTNNB1
EPOR	SYK
SMAD7	RNF111
ZBTB16	CDC2
ERBB2	STAT3
ACTG1	CFL1
RAB5A	AGTR1
POLR1E	CD3EAP
NXT1	NXF3
MYC	MED12
CDC34	FBXL3
NR2F6	THRB
BRCA1	ATR
YWHAH	PIK3CA
NF2	SOS1
AP4B1	AP4M1
PRKAR1A	ARFGEF2
SPDEF	NKX3-1
NFATC1	EGR2
NFATC1	EGR1
YWHAZ	NFATC4
MYC	MED14
NEDD4	ISG15
PML	JUN
COPA	COPB1
TK1	PTPRK
PRLHR	GRIP1
PER1	CRY1
COPB1	TRIM37
YWHAB	USP8
FOS	CSNK2A1
CDK5R1	CTNNB1
GPR183	MTA1
SPAG9	MAPK14
PRKRIR	STK4
COL18A1	KDR
PTPN11	PDGFRB
GMEB1	TRIM63
RUNX1	FOS
PIAS2	STAT4
RFXANK	RFX5
ITGA1	BIN1
TRAF1	TRADD
TNNI3K	FABP3
PRKAR1A	PRKACA
MAPK14	ETV1
RABEP1	GGA2
TAF13	TAF9B
MYC	GTF2B
HRAS	RASGRF1
STAG1	RAD21
HDAC1	RUNX1T1
ITCH	DTX1
SNX1	EGFR
NEK6	USP9X
CDC45L	ORC6L
TBP	ESR1
MYC	GTF2I
KRAS	RAF1
NME3	SGTA
PPP1CB	PPP1R8
GTF2B	TAF11
MYOCD	SRF
SMC1A	SYCP3
TOPORS	TOP1
NEDD8	CUL5
ACTB	ACTG1
BRCA1	SP1
PRKCA	AVPR2
CASP3	TRAF3
TCF3	TCF3
KLF5	EP300
EP300	NAP1L1
DRD2	PPP1R9B
RBL1	KDM5A
NFKB2	NFKB1
NFKB2	NFKB2
NPLOC4	VCP
ZNF434	ZNF434
BRF2	COPG
MAPK7	YWHAB
MAPK7	YWHAE
ATN1	ITCH
BRCA1	PEG3
PDPK1	SGK1
CIB1	PRKDC
CDK4	VTA1
RHEB	HRAS
TOLLIP	RHOXF2
TFE3	SMAD3
HSPG2	PDGFA
OBSCN	ANK1
MRE11A	MSH2
TERF1	CDC6
USP7	SCML2
CDC25B	AR
UBE2N	CHUK
SP1	MYC
MYC	MAPK1
RB1	AR
AKT1	HSP90AB1
MYC	MAPK3
PTPRC	SKAP1
CAMK2A	CHMP5
SH3KBP1	KIT
HSPG2	PDGFB
CDC25A	CDK2
TBK1	CUL1
POLA2	PARP1
XRCC5	POLA1
GTF2A1	TBPL1
RAB11B	RAB11FIP2
RAB11B	RAB11FIP3
MYC	MAPK8
ING2	ACTL6A
RAB11B	RAB11FIP1
KAT5	TRRAP
RAB11B	RAB11FIP5
EYA2	RBPMS
TGFB2	DAXX
CDC45L	ORC2L
ILK	RSU1
FHIT	UBE2I
CD9	CD46
COPS5	JUN
TRIM25	TRIM25
TAF13	PARP1
CCNT1	CDK9
FBXL3	CUL1
BCL2L10	BAX
RBX1	RPS6KB1
TSG101	KIF5A
MCF2	GNA13
FANCC	HSPA1A
TAF10	KAT2A
HIF1A	NCOA1
TAF10	KAT2B
NR2F6	ESR1
MOBKL3	UBE2V2
EP300	CLOCK
HTR2C	DLG4
VTN	EGF
BAZ1A	BAZ1B
NCK1	SOCS1
MAPK1	CIITA
SREBF1	UBE2I
HDAC1	SPI1
CDK7	HSP90AB1
STEAP3	BNIP3L
FOXA1	ONECUT1
NCK1	KHDRBS1
LRP1	PDGFB
CDKN1B	XPO1
CD9	PRKCA
CCND3	RARA
HSF1	HSPA1A
SFN	RACGAP1
CALM1	TCF4
CALM1	TCF3
MAP3K14	MAP3K14
FOS	GTF2E2
CTNNB1	CHD8
SCGB1A1	LRP2
JUP	WDYHV1
CASP4	IL18
AURKA	SOD2
AP1M1	LDOC1
GRB2	PRKAR1A
POLR2G	POLR2G
POLR2G	POLR2E
ERBB3	ZNF207
TDG	VDR
CDK9	ARID3B
ARIH2	ARAP1
CDK9	HSP90AB1
HMGA2	PIAS3
CREBBP	NFATC2
MYC	CEBPB
RAB11FIP2	RAB25
RAP1GAP	MEX3B
MOBKL3	MED31
CREBBP	NFATC4
MYC	CEBPA
TRAF1	RIPK1
TRAF1	RIPK2
PAX6	RAX
MAGED1	RFX1
PLD2	ARF1
S1PR4	GNA12
FYN	NTRK2
PAX6	RB1
HRAS	PIK3CD
RHOA	GNA12
L3MBTL	ETV7
HRAS	PIK3CA
GRB2	PTK2
TRIB3	PSMA3
HRAS	PIK3CG
SMAD2	INSR
HDAC9	HDAC4
GATA2	HDAC5
HDAC9	HDAC1
GATA2	HDAC3
LYST	VTA1
HDAC9	HDAC3
SLAMF1	PTPRC
UPF3A	SMG1
SFN	WDYHV1
TAF13	TAF10
LILRB2	HLA-B
KDR	RASA1
MCC	CSNK1D
IGFBP4	IGF2
MCC	CSNK1E
IGFBP4	IGF1
VCP	VCP
EWSR1	HMGA1
WDR48	ZNF639
PIK3R1	INPP5D
YBX1	CTCF
MCM6	ING5
THRB	PSMC5
HGS	MED7
TBPL1	PMVK
SORBS3	EFS
POLR2J	ELAVL1
FOS	GTF2F2
PEA15	RPS6KA3
ERBB2	EGFR
ING5	TP53
PRKRIR	PRKRIR
PLCE1	NRAS
CD4	CCR5
EP300	ASCL1
SUFU	SUFU
SMARCA2	RUVBL1
EDF1	TBP
CD44	EGFR
FLNA	RALA
HDAC2	HIF1AN
AUP1	ITGA2B
NUP62	KPNA1
PAX3	MSX1
SYP	GRB2
NUP98	EP300
SORBS3	DLG5
ULK1	SYNGAP1
LRP1	SNX17
PAK1	NCK1
MDFI	SIX1
MLL2	CXXC1
RAB5A	RABEP1
LRP2	LDLRAP1
APEX1	HIF1A
TCEB2	TCEB3
CREG1	TBP
CRK	NEDD9
CDC14A	FZR1
SNX9	ADAM9
PTK2	ATG12
LYN	PDE4A
CDKN2A	DAXX
MAPKAPK2	ETV1
MAPK8	IKBKAP
MBD3	GATAD2B
TFE3	AKR1B1
TRIM24	RARA
SRC	FYN
CCND3	MCM10
A2M	IL10
CD4	CD81
MCM6	MCM6
ZBTB16	NR3C1
KIT	STAT1
MCM6	MCM8
MCM6	MCM2
APP	CAV1
HNRNPA1	SYNCRIP
MCM6	MCM4
GRIP1	NUMBL
JAK1	STAT3
CDC7	MCM5
HDAC5	PRKD1
HMG20B	TACC2
CDC7	MCM3
ABL1	INPPL1
CDC7	MCM7
IL2RB	STAT3
TAF1D	POLR1A
TAF1D	POLR1B
TAF1D	POLR1C
CSNK2A1	MME
SGTA	F11R
TAF1D	POLR1E
CASP6	TRAF1
AR	TSG101
GATA2	ZBTB16
POLR2A	CDK8
FES	BCAR1
TNFRSF21	TRADD
FUS	RELA
IL2RB	STAT1
NACA	JUN
RGS20	PMVK
MVP	ESR1
ATR	LIG4
PRKCA	GJA1
PHF17	MEAF6
SRC	PTK2B
CD5	RASA1
GADD45A	DCTN2
PIK3R1	FGFR2
ISL1	ESR1
SPP1	ITGA5
APP	APPBP2
USP7	TRIP12
HNRNPA1	HNRNPA1
ZBTB17	MYC
EIF4A2	PDCD4
TAF10	TAF9B
TIAM1	PPP1R9B
GTF2A2	TBP
SGK1	MLLT3
ING4	MEAF6
EWSR1	ZNF165
BRCA1	WNT2B
LRP1	GULP1
SFN	PARD3B
SMAD3	MEN1
PER3	PER2
RPAP1	ZFR
RAB4A	RAB11FIP1
BNIP2	BCL2
PDLIM1	STK35
NR2C1	ESR1
ZBTB16	LDOC1
HSF1	PRKDC
CDKN1A	TSG101
CYFIP1	FMR1
FBXW11	OGT
HDAC1	GTF2I
MAGED1	CCDC59
EWSR1	SLC1A1
DVL2	SNIP1
BMI1	CBX4
MAGED1	PLK1
CDC42EP3	CDC42EP3
GEM	PDLIM7
BZW1	PSTPIP1
TRIM63	TRIM54
JAK1	GRB2
DGKZ	VHL
GAB2	PIK3R1
HGS	UBQLN1
LZTS1	CDC2
RPS6KB1	XPO1
ANXA2	APOH
TANK	CHUK
ISL2	LHX3
GZMB	SERPINB9
TAF1D	TBP
CEBPZ	TP73
E2F2	RNF144A
ZBTB16	ENOX1
ESR1	TRRAP
XBP1	ESR1
PIK3R3	DRAP1
CDK4	PCNA
PTEN	MVP
MATK	KIT
USO1	BET1
MOBKL3	CCDC59
AHR	GTF2F2
CDK5R1	ACTN1
POU1F1	VDR
RUVBL1	LEF1
CSNK1G2	COL4A3BP
POU3F1	HMGA1
MAP3K8	CHUK
PML	RELA
RB1	HDAC1
SP1	TAL1
RB1	HDAC3
RB1	HDAC2
SOX9	HSPA1A
MCC	KRT18
ORC1L	CCNA2
ITGB3	PTK2
ATF2	UBE2I
PRKACB	NGFR
KIT	INPP5D
CEBPZ	TP53
PMF1	NFE2L2
CBFA2T3	TCF3
EDAR	EDARADD
HMG20B	HDAC1
RUNX1T1	VDR
VAV1	CBL
EPHB1	NCK1
LTBR	TRIM37
TAF10	HSP90AB1
VHL	TAGLN2
RB1	MDM2
TLR4	SIGIRR
SNUPN	XPO1
ITGB1	ITGA3
PTPN11	CTNNB1
RASSF1	RASSF1
BMX	SRC
ITGB1	ITGA9
AMFR	DERL2
ITGB1	ITGA8
KAT5	ING3
RPS6KA6	NR4A1
FOXP3	HDAC9
MLLT10	MLLT10
LYN	PIK3CG
EID1	EP300
ATXN7	TAF12
ATXN7	TAF10
PPP2CA	PRKCD
CDC2	GADD45A
DAXX	SUMO1
HBEGF	ZBTB16
HGS	ATP2A2
HGS	LDOC1
NCOA6	ESR2
VHL	TCEB2
SFN	PAK4
AR	HDAC3
AR	HDAC4
JAK1	STAM2
IL8RB	IL8RB
ERBB2	CTNNB1
VHL	CDK2
AMFR	DERL1
RAD9A	ABL1
TADA3L	TADA2L
BRCA1	BLM
MOBKL3	GDF9
ATR	AP1B1
DOK1	PLCG1
GRIK2	PICK1
SYK	PTK2B
TSC2	AXIN1
MAPK8IP2	MAPK8IP2
GNA12	PPP5C
GRAP2	LAX1
SNX6	TGFBR2
NEDD8	AHR
SNX6	TGFBR1
RELB	ACTL6A
BRCA1	MED13
HDAC1	SAP30
PPP2R1A	PPP2R5C
TRAF2	SOX30
LDB1	TCF3
CCND1	THRB
PCNA	POLL
SFN	KIF23
NEDD4L	NEDD4L
ITGB5	PAK4
ZYX	BCAR1
GATA2	JUN
ARPC2	ARPC3
HSP90AA1	HSPA1A
PPP2R1A	PPP2R3B
MKI67	KIF15
KCNIP3	PSEN2
GSK3B	EWSR1
TNFRSF10A	TRADD
SP1	TAF4
BUB1B	HDAC1
CHTF18	SMC1A
PRKACA	CAV1
RBBP5	TUBB
AP1G1	AP1M1
TERF2	XRCC5
MSH2	RFC1
MDM2	MDM4
MDM2	MDM2
EWSR1	KHDRBS2
DVL1	DVL1
HMG20B	CCDC85B
MYC	TIAM1
ADRBK1	RHO
PRKCE	SLC25A4
VIM	PDLIM1
CASP4	SMC1A
ZBTB43	TCEB3B
THRA	MED1
IGF2R	PLIN3
VAMP2	VAPB
MAPK8IP2	MAPK10
CCND3	TSC2
RPS6KC1	SPHK1
SMAD7	MAP3K7
PKP2	KRT18
SEMA4D	SEMA4D
DEDD	RANBP3
TFE3	CLTC
BAIAP2	NCKIPSD
DNMT3B	SMC4
MED19	CDK8
TANK	ZC3H12A
DNMT3B	SMC2
CUX1	BIN1
E2F1	RNF144A
CXXC1	KIFC1
UPF1	SMG1
ATXN7	PSMC2
ATXN7	PSMC5
CD81	IFITM1
RAB8A	RPH3AL
ITSN1	EPHB2
DRG1	CAPNS1
CD2AP	CASK
HOXA5	FOXO1
PRKRA	RB1
ITK	FYN
USP7	CLSPN
RAB8A	MAP4K2
CUL5	RBX1
PECAM1	PECAM1
PTK2	SYK
TLE1	HES6
FGFR1	KPNB1
SMAD3	KDM5C
PRLHR	PICK1
GNA12	HSP90AA1
MYOG	SP1
THOC1	RB1
ARFGEF2	PRKAR2A
SMAD1	FOXG1
SUMO1	HIPK2
SUFU	ZNF446
GRIA2	GRIP1
ABL1	BCAR1
SMAD1	HIPK2
RXRA	NR2F6
AR	MDM2
HNF1A	PCBD2
PCNA	MSH2
PRKCA	ATP1A1
IFNAR1	STAT3
ELF3	JAK1
AGTR1	GRK5
IFNAR1	STAT2
POLR3F	STC2
CCR4	CCL3
EIF2B3	EIF2B5
CCR4	CCL5
POLA2	POLA1
ATM	E4F1
PUF60	IGF2BP2
PUF60	IGF2BP3
MAPK1	AR
AURKA	TPX2
STK11	STRADA
POLR2C	STC2
PANK2	RASGRF2
CSK	TGFB1I1
KDELR1	KDELR1
CENPH	KIF2C
EP300	ZBTB17
RPS6KA1	BAD
MBD3	HDAC2
PPARA	PRIC285
PCNA	MCL1
BCOR	HDAC3
BCOR	HDAC4
BCOR	HDAC1
PUF60	IGF2BP1
E2F1	NDN
SMAD3	AR
E2F1	CUL1
NCOA1	KAT2B
MLLT4	USP9X
EWSR1	LILRA3
PPP2R1A	PPP2R5E
PPP2R1A	PPP2R5D
FGF1	FGF1
BMPR2	FRS3
NUP62	HSF2
CCNA2	PCNA
RARA	RXRG
TOLLIP	TOLLIP
SFN	CSNK2A1
RARA	RXRB
EGFR	NRG1
KAT5	LRP1
CSNK1A1	HMGB1
APOA1	APOA1
CSNK1A1	HMGB2
MAP3K1	MAP2K1
ARHGEF1	ARHGEF1
PSMA1	NMI
GRAP	EPOR
FEN1	APEX1
TBL1X	NCOR2
CDK9	HSPD1
CASP4	GSN
TDG	RARA
NR1I2	NCOA1
BRCA1	DNAJA3
LYN	PPP1R8
NFKB1	HDAC1
COPS5	VprBP
LGALS1	LGALS3
PTK2	PPP1CB
TARDBP	SETDB1
CRK	SHB
CRK	CBL
IRS1	SOCS1
LRP2	DLG4
EIF4E	EIF4G2
EIF4E	EIF4G1
ERAS	PIK3CG
GADD45A	ESR1
MEIS1	HOXD9
CD44	TGFBR1
STAT3	HIF1A
JAK3	IL2RG
AR	SRY
ACVR1	FNTA
HOXA5	FOXA2
KIT	TEC
AR	SRC
MARK2	UTRN
JAK2	EPOR
PTEN	AR
ERBB2	PIK3R2
PIK3R1	PIK3R1
HES1	TLE2
USP7	NUP98
LGALS3	LGALS3BP
DVL2	DVL2
SIAH1	VAV1
BRCA1	NPM1
BCOR	MLLT3
PLCG1	RASA1
MYB	FBXW7
CDC25C	PCNA
ERBB4	NCK1
WDR48	BRCA1
KIT	YES1
CTBP1	KAT2B
ITGAM	ICAM1
TTF2	TACC3
FGFR1	PLCG1
SETD1A	ASH2L
NR0B2	THRA
RBPMS	STRBP
SELS	UFD1L
RICS	GAB1
ESR2	SRC
CDC5L	SFPQ
NUP50	NUP153
BMPR1A	BMPR1B
BRCA1	STAT5A
BMPR1A	BMPR1A
KHDRBS2	HNRNPD
RICS	GAB2
CCNA2	CDKN1C
RYBP	E2F6
IRF3	CREBBP
ATM	WRN
NCOR2	SAP30
CCNA2	CDKN1B
CCNA2	CDKN1A
NOTCH1	DLL1
CSNK1A1	ERF
RUNX2	HDAC3
NKX2-1	RARA
IKZF1	HDAC4
BTRC	NUDC
HDAC1	CDYL
TEC	GNA12
IKZF1	HDAC2
SUMO1	SUMO1
TSC22D1	CDK2
L3MBTL	L3MBTL
ATP6V0A4	PFKM
ZNF263	SCAND1
HK3	IGFBP4
HDAC3	SKI
EGR2	MED31
CDKN3	CDC2
JAK1	BTK
GRM3	SDCBP
MCM2	MCM2
CCDC85B	ZNF821
RAB1A	CDKN1A
MCM2	MCM4
MAD2L1	MAD1L1
MCM2	MCM3
RELA	CREBBP
CTBP1	TBP
GDI1	RAB1B
CD9	ITGB1
MCM2	MCM7
HSP90AA1	HSF1
ITGB2	PLAUR
PKN2	PDPK1
SMAD1	NEUROG1
CCDC85B	KRT20
AKT1	BAD
BCL2L1	BNIP3
RB1	RBBP7
CASP1	NOD2
NUP214	NUP107
ZNF165	ZNF446
TERF1	CAPNS1
RXRA	ARNTL
DLG4	BAI1
BMPR2	ACVR1B
COPS5	CUL1
DSN1	PMF1
RASSF1	MAP1S
SYK	LAT
CDK2	PRKCH
KCNJ12	DTNA
NCK2	PKN2
HGS	GGA2
PAK2	RAC2
VHL	MOBKL3
CREBBP	PHOX2A
TNFAIP3	TRAF2
TNFAIP3	TRAF1
APPBP2	SYT11
SERPINE1	ORM1
RFXANK	DDOST
PLK1	CHEK2
MRE11A	TERF2
ATF4	CREBBP
CD28	CD80
BCL2	RRAS
BANF1	BANF1
VAV1	RACGAP1
TGFB1I1	NR3C1
AXIN1	GAK
RB1	PRDM2
PTGS2	CAV1
PPP1R1B	DLGAP4
RUNX2	MSX2
MYC	MKLN1
FLII	DLST
TK1	GAPDH
AKT1	CHN2
GRM1	GRM1
FABP4	VIM
SP1	KLF4
CASP9	APAF1
NGFR	NGFRAP1
IRAK1	CHUK
ATXN7	CRX
HOXA1	MDFI
F10	PRKAB1
PRKCB	TIAM1
ACTB	CFL1
SOS1	PTPN6
SMARCC2	ACTB
PPP1R8	PPP1CC
EP300	TAL1
TOLLIP	TOM1
ACVR1	GDF5
HOXA9	MEIS1
GNG13	GNB5
PLD2	GAPDH
GRB2	GHR
PTEN	PXN
LIN7A	CASK
RNF4	PATZ1
GNG13	GNB1
DBF4	MCM3
DBF4	MCM2
TIMELESS	ATRIP
SGTA	PTN
VHL	RAB1B
BIRC6	KIF23
THRB	TBL1X
SMAD2	JUN
EXT2	CNTF
DBF4	MCM4
ATF2	JUN
DBF4	MCM7
LIN7A	APBA1
OSMR	ERBB2
PAK1	CDC2L2
FLNA	ITGB3
ROS1	PTPN11
PML	FOS
CDKN2A	CCND2
CDKN2A	CCND1
TP53BP1	RPA1
EGFR	STAT1
RUVBL1	TBP
FLNA	ITGB6
ZNF250	ZBTB8A
BCAR1	LCK
ADRB2	EIF2B1
FLNA	ITGB7
EGFR	STAT3
LCK	SKAP1
AATF	RBL2
AATF	RBL1
CXXC1	ASH2L
MAP3K12	MAP2K7
GRB2	PAG1
CCDC85B	TCEANC
UNC13B	VAMP2
SHC1	SOS1
SNX6	BMPR1B
SMAD3	E2F4
CDC20	CDKN1A
PLCG2	PRKD1
CDC6	PPP2R3B
CHEK1	CLSPN
SHB	FGFR1
PXN	NEDD9
APC	APC
HNRNPA1	ARHGAP23
PRKCA	GSK3B
RBPMS	NEU4
FLI1	ETV6
CASP1	EGFR
JAK2	DNAJA3
CAP2	ACTG1
SRC	GRB2
TAF10	MCM6
XRCC5	ORC1L
PRKCB	CDC2
ANKRD1	TTN
SIAH2	UBE2I
RAB3B	RPH3A
MUTYH	PCNA
PUF60	UGP2
GDI1	RAB9A
CDK2	CDK6
NEK6	RUVBL2
MCRS1	MED4
BTRC	PRKACA
PRKCI	BAD
XRCC5	ORC2L
MYOD1	STAT3
HCK	IL6ST
DGKZ	PARD6A
CDK2	SPDYA
SYK	LYN
USF1	USF1
CITED1	HSPA8
NR3C1	TSG101
PPP2R5B	PPP2CA
IPO13	RBM8A
TAF4	TAF12
YBX1	PCNA
ISL2	ISL1
HDAC2	CBFA2T3
NFKB2	BTRC
COPB1	ARCN1
ARR3	ZNF496
E2F1	ARID3A
FUS	RXRA
KNTC1	ZW10
CCND1	HDAC3
GSK3B	IGF2BP1
TP53	USP7
TAF9	TAF5L
IRF3	IRF5
TFRC	TFRC
GSTM4	TLE1
IRF3	IRF7
SMAD4	TFE3
ERBB2	ERBB2
RIN2	RAB5B
ERBB2	ERBB3
TAF4	TAF10
VHL	EPAS1
TCF4	ID1
SAE1	RANBP2
XIAP	STRADB
YWHAZ	CDC25A
BCL2L1	CASP9
CTBP2	BAZ2B
SFRS17A	CCDC85B
NFIB	NFIC
XPO6	NUP62
SKI	SKIL
BIN1	SNX4
PAK1	BMX
IKBKG	COPS3
BRCA1	KPNA2
GRB2	MICAL1
COPS5	ERCC8
GPC3	FGF2
TBK1	NFKB2
BRCA2	KAT2B
RELA	MEN1
CDK9	RQCD1
ATN1	MYST2
SAE1	UBA2
RBL1	BRF1
TNFRSF1A	TRADD
ARHGAP17	CRK
IRS4	HSP90AA1
PRKCE	ACTA1
NCKIPSD	NCK1
IL1RAP	TOLLIP
EMD	COPS6
CREBBP	FOS
IDE	IGF2
CAV1	TRADD
IDE	IGF1
SOS1	ABL1
NCOA1	FOXA2
RBL2	CCNA2
WRN	XRCC5
RBL2	CCNA1
IL6ST	LIFR
PIK3R1	FES
TIMELESS	CRY2
NCOA1	CCND1
KAT2B	TCF3
EWSR1	TRIM37
ZBTB17	HCFC1
CDT1	TOP1
ATXN7L3	KAT2A
KRT18	EXOC8
AP1G1	AP1S1
RHOH	ARHGDIB
AR	TBP
IRF2	KAT2A
ITGA8	NPNT
APC	SIAH1
RAF1	GNG4
SP1	PSIP1
LEO1	RTF1
PEA15	PLD1
JAK1	IL2RB
SUMO1	RANGAP1
RANBP1	RAN
VHL	TRIM28
MORF4L2	RB1
VAV1	EPOR
GTF2I	HDAC2
RAD9A	AR
WDR48	WRN
NISCH	IRS1
NISCH	IRS2
RELA	ASCC3
WASL	RHOQ
SOS1	ABI1
BAK1	AKAP13
ZNF434	ZNF167
NEDD9	NCK1
PTPN11	JAK1
CD24	LYN
MYOD1	MEF2C
SLA2	CSF1
EWSR1	CALM1
ZNF496	NSD1
THRB	SRC
PGR	UBE3A
ABCA1	CREBBP
SSRP1	NEK9
IL2RB	JAK2
FYN	EPHB3
MED28	MED7
S100A13	SYT1
MED28	MED4
TEAD4	WWTR1
TESK1	YWHAB
MED28	MED1
STX1A	TXLNA
RNF4	PGR
BRCC3	EXOC8
INSR	SORBS1
RANBP1	XPO1
RBM14	XRCC5
PLK1	PSMA3
PLK1	PSMA1
FYN	EPHA3
FYN	EPHA4
RET	DOK1
E2F1	HDAC1
BIRC2	JUP
TCF4	HBP1
LYN	DOK1
CAV1	S1PR1
STAT3	PML
GRIA1	DLG1
STC2	PTN
STAM	JAK2
TEC	DOK1
STAM	JAK3
MTA2	RBBP7
CD81	ZBTB16
ALK	SHC1
ARNT	NCOA2
PIAS2	NR3C1
BAZ1B	ACTL6A
SNX2	EGFR
HDAC1	HIF1AN
CAV1	TRAF2
DLK1	GAS1
AFF4	CCNT1
ORC1L	CDK2
CD46	DLG4
TINAGL1	MED31
DAB2	APLP2
HCFC1	PDCD2
NCOA1	ESR2
FABP9	LIPE
ETS2	JUN
DRD4	GRB2
PCNA	RUVBL2
TNFRSF10B	RIPK1
RCOR1	ZNF217
KAT2B	CCND1
PHB	ANXA2
ITGAL	ICAM1
RUNX1	TLE1
TCERG1	SF3B2
ABL1	JAK1
IL6ST	PRKCD
ZNF193	ZNF446
PHF21A	HMG20B
HDAC2	RUNX1T1
TNFRSF1A	TRAF1
BMP7	BMPR2
TNFRSF1A	TRAF2
ADAM9	PRKCD
TRAF3	RIPK1
PAX6	CDX2
MAP1LC3A	SQSTM1
PIAS2	GTF2IRD1
TAF4	TAF8
RAB1A	CREB1
SFN	APLP2
ASH2L	MLL3
AES	HNF1A
NR4A1	RXRG
SPI1	GATA2
NR3C1	MED14
RALBP1	CCNB1
BAX	SH3GLB1
NME1	POLR1C
RBX1	CCND3
RBX1	CCND2
GNMT	GNMT
RBX1	CCND1
TAF4	TAF4
NR4A1	RXRA
CSNK1E	AXIN1
TAF4	TAF5
HMGA2	NFKB1
PRKCI	GAPDH
DRD3	MPDZ
ORC2L	MCM10
LYN	TYK2
ZSCAN20	SCAND1
RUVBL2	PLOD2
CDC20	CDC27
DNMBP	WIPF3
GATA1	ARID1A
C5AR1	GNAI3
MAPK3	RAF1
C5AR1	GNAI2
CGA	PTN
IQGAP1	CALM1
BTRC	TP63
ZFP36	CCDC85B
CAP1	ACTG1
PDCD4	EIF4G1
BRCA1	BRCA1
IGF1R	ESR1
CDC20	CDC20
NOV	NOTCH1
RAB27B	RPH3AL
CDC20	CDC23
CDK9	CUL1
SH3KBP1	MET
RBM8A	UPF3A
RNPS1	THRAP3
SHANK2	DYNLL1
KDR	GRB2
TLE2	TLE2
GTF2A2	TAF4
MAP3K11	AKT1
EIF4A2	VAC14
HDAC3	XPO1
VAV1	PRKCQ
ITGB1	PRKCA
RNF2	CBX4
NR1H3	BARD1
PTPRJ	CTNNB1
UBE2B	CDKN1B
GRB2	EGFR
CCNA2	FEN1
JUN	TOP2A
TTF1	BAZ2A
CDC20	CDC16
RB1	CCND1
ING1	HDAC2
HTR1A	HTR1D
ID3	TCF12
ACTB	ACTB
PTK2	STAT1
PTK2	STAT3
RB1	CCND3
RBX1	NEDD8
HGS	CASK
HDAC4	MEF2A
TOPORS	SUMO1
RXRA	NR1I3
ORC5L	ORC4L
HDAC4	MEF2D
CDK2AP1	CDK2
POU2F2	MNAT1
ATP2B4	DLG1
SIRT2	RTN4
FOSL1	JUN
EPS15	GRB2
RAB1A	HIVEP1
INSR	PTPN11
EP300	IRF2
PLCG1	GHR
PRKCA	AVPR1B
E2F1	CDK2
NR3C1	TP53
PRKCA	AVPR1A
CREB1	TP53
RXRA	NR1H4
DYNLL1	DLG4
GJA1	MAPK7
RXRA	NR1H3
NR3C1	NFKB2
NR3C1	NFKB1
ORC5L	ORC5L
CD44	TIAM1
HDAC2	RBL1
CD9	IGSF8
UQCRC1	RUVBL2
MDFI	SFRS17A
SORT1	GGA2
SORT1	GGA1
GFRA2	GDNF
EGFR	PRKAR1A
DVL1	CSNK2A1
PHC1	BMI1
HGS	SNX1
YEATS4	KIAA1009
IL8RB	IL8
RHOA	PKN1
YWHAH	PDPK1
CDK9	KPNA2
FGFR1	FGFR1
APAF1	CASP4
BTRC	OGT
REM1	YWHAZ
LDOC1	ZNF408
ERAS	RAF1
KIF15	MAP1LC3A
NCOA6	MLL3
ZBTB25	SORBS3
MAGED1	UBR5
ESR1	TDG
ROCK1	GAB1
MMP2	A2M
BCL2	RAF1
DOCK1	SRC
[truncated: 8,401 more rows]

## Sheet: 498 proteins
SMAD2	TGIF1
SRC	PTK2
AR	FOXO1
SRF	CREBBP
MAPK11	HDAC3
HDAC2	SETDB1
AR	GTF2H1
NCOR2	TBL1X
TP53	HMGB1
ABL1	PAG1
RPS6KA3	MAPK3
MED1	BRCA1
PEA15	MAPK3
PIK3C2B	SHC1
RPS6KA3	MAPK1
PEA15	MAPK1
ZAP70	RASA1
PTK2B	CBL
SH2B1	INSR
PHB	RB1
PML	NCOR2
TADA2L	HGS
LYN	PAG1
ZMIZ1	AR
TBP	KDM5A
HDAC2	VHL
UBE2I	WT1
RELA	FOS
PIK3R3	IRS1
GSK3B	PTK2
PTK2B	PTPN11
INSR	SYNCRIP
TGIF2	SMAD3
UBE2I	TCF3
ARHGEF1	RHOA
MAP3K1	DVL2
TDG	AR
PML	SP1
CDC20	ANAPC10
CREBBP	CREB1
SFN	PIK3C2B
HDAC9	SUV39H1
CTNNB1	HNF4A
FOXO4	XPO1
SP3	HDAC2
SP3	HDAC1
PTK2	TP53
NCOA2	NR3C1
CCNH	CDK7
PECAM1	MAPK1
E2F1	PHB
MAPK1	ATP1A1
ITK	SRC
HCFC1	SP1
IQGAP1	RAC1
BTK	BTK
PLCG1	SRC
MAPK3	ATP1A1
NEDD9	ABL1
TBP	FOS
MAPK14	RPS6KA3
IKZF2	CHD4
CCND2	TSC2
PTPRF	RET
HRAS	MAP2K1
BRAF	AKT1
TYK2	VAV1
SNX4	INSR
GRK5	GRK5
TSHR	STAT3
SOS2	SHC1
EGFR	IGF1R
PECAM1	PLCG1
RBL1	E2F1
ARHGEF1	GNA12
HSPA1A	RHOA
TRAF2	HINFP
HNRNPA1	HNRNPK
PIK3R1	PTPN11
YES1	FYN
GSN	PTK2
TCF3	EP300
BCAR1	NCK1
PIK3R1	CSF1R
SMAD1	PARD3B
MBD3	RBBP7
RB1	JUN
ARHGAP17	PIK3R1
PPP1R9B	ACTA1
PA2G4	AR
NCK1	PTK2
RHEB	ATR
CTNNB1	CEBPA
SRC	MICAL1
PECAM1	PTPN11
TRAF2	TRAF2
SP1	JUN
PHB	HDAC1
LTK	CBL
CALM1	GRK5
TBP	GTF2F2
JUN	CSNK2A1
SMARCA2	ESR1
STAM2	TYK2
EP300	CEBPB
RXRA	RARA
DAXX	PML
MED28	MED28
RAC1	STAT3
PRKDC	BRCA1
PTPN6	LCK
RELA	JUN
ELK1	EP300
PML	SKI
SMAD2	HDAC1
RPS6KA3	PEA15
RB1	ABL1
HIPK2	SP100
STAT3	PIAS3
CSK	FYN
CTNNB1	ESR1
PPP1R9B	RASGRF1
BTK	VAV1
PIK3R1	KHDRBS1
AR	GTF2F2
NR3C1	NCOA3
SRC	BCAR1
PTPN11	STAT5B
SMAD3	RUNX1
CAV1	PDGFRB
PTPN11	STAT5A
CAV1	PDGFRA
JUN	UBE2I
ROS1	VAV3
IKZF3	HDAC2
ETS1	DAXX
SRC	STAT3
EP300	TDG
IKZF3	HDAC5
IKZF3	HDAC4
SNX6	PDGFRA
TRAF2	SIAH2
CTBP2	CTBP2
RARA	NCOA2
CTBP2	CTBP1
SP1	SUMO1
PML	EIF4E
PTPN11	IRS1
STAT3	KHDRBS1
UBE2I	PDLIM7
DOK1	KIT
IKZF2	IKZF2
IKZF2	IKZF1
TRAF2	CAV1
IKZF2	IKZF3
CTNNB1	CREBBP
JAK1	TSHR
SAP30	ING1
SMAD3	RUNX3
DNMT1	HDAC2
KDM1	HMG20B
NR3C1	NCOA1
SMAD3	RUNX2
CDK9	SYNCRIP
HSP90AA1	SRC
NR3C1	ETS2
UBE2I	RIPK2
RNF4	ESR1
MYC	CDK9
SNX4	EGFR
NEDD9	PTK2
IGF1R	PTPN1
MAP2K1	GRB10
DDR2	SRC
PML	RXRA
LCK	PAG1
DAB2	APP
RASA1	NCK1
NCOA6	AR
ZAP70	PLCG1
HDAC2	RBBP7
ZAP70	SHC1
RAF1	LCK
HRAS	INSR
CALM1	SYT1
IRS2	PTPN11
PLD2	PEA15
AR	NR0B1
MYST2	AR
HNRNPK	UBE2I
INSR	RASA1
SIAH1	HIF1AN
CDK9	HNRNPK
TRAF2	TNFRSF1B
MYC	TP73
GATAD2B	HDAC2
ERBB2	JAK2
GATAD2B	HDAC1
JUN	POU1F1
BCAR1	ABL1
ING2	RBBP7
PTK2B	PTK2B
BUB1	HDAC1
PPARG	HDAC3
DUSP6	MAPK3
PPARG	HDAC4
DUSP6	MAPK1
TBP	JUN
BRCA1	ETS1
IRS1	PIK3R1
GRB2	DAG1
HDAC4	HDAC4
HDAC4	HDAC3
EPS15	EGFR
NR2F6	NCOA1
NR3C1	SMARCC1
RIPK2	TNFRSF1A
AR	TCF4
BAG1	RARA
DAXX	MDM2
SRC	MET
AR	GSN
CAV1	CSK
SRC	PIK3R1
MAPK1	TP53
EGFR	ERBB3
SRC	PRKCZ
SATB1	UBE2I
NGFR	TRIM37
RBBP7	BRCA1
GRB10	RET
GSN	TOM1L1
TSC2	RPS6KA1
PPARG	NR0B2
HSP90AA1	AKT1
MKNK1	MAPK1
ING1	PCNA
PTK2B	FYN
RCOR1	PHF21A
USP7	DNMT1
FRS2	NTRK1
CREBBP	CSK
VAV2	EGFR
CSNK2A1	SPI1
NFKB1	NFKB2
ITK	HNRNPK
PTK2	MDM2
GRB2	SH2B1
NFKB1	NFKB1
RELA	SP1
CEBPA	ESR1
GRB2	SYNCRIP
HCK	PECAM1
MAPK8	TNFRSF1A
MED28	MED14
CDKN2A	TOP1
HDAC4	CTBP1
VAV1	MAPK1
NFKB1	NCOA1
MET	SOS1
LEF1	CTNNB1
ELP2	STAT5B
TP53	HSP90AA1
CSF1R	SRC
CBFA2T3	RUNX1T1
RB1	TBP
CBLB	SH3KBP1
PTPN1	GSK3B
CHUK	CUL1
BCL6	PML
NCOA6	JUN
HRAS	RAF1
EPOR	PTPN11
HNRNPK	NCK2
ITK	KHDRBS1
GRB14	FGFR1
SFN	NR3C1
XRCC5	VAV1
GRB2	SYK
SOCS3	RASA1
NR4A1	EP300
SMAD4	ATF2
ITK	GRB2
KDM1	ZMYM2
NCK1	CRK
MAP2K2	MAP2K2
MDM2	TBP
YWHAB	CSNK2A1
UCHL1	TP53
INSR	IRS1
INSR	IRS2
EP300	RELA
TOB1	RPS6KA1
ADRB2	SRC
CTNNB1	GSK3B
EGFR	GAB1
HDAC2	DAXX
G3BP1	FLNA
POU1F1	GATA2
PLCG1	SYK
PCNA	RFC1
PPARD	PPARD
HDAC1	RBL2
GRB2	IQGAP1
AR	EGFR
HSPA8	DNAJA3
JAK1	PTPN11
PTPN11	SOS1
HDAC1	RBL1
EGFR	GRB14
LCK	PECAM1
RUNX1T1	ZBTB16
MTA2	MTA2
CUL1	E2F1
PTPN1	CAV1
SREBF1	SP1
MAPK8	ELK1
RNF4	AR
HDAC1	HSPD1
UBE2I	TNFRSF1A
DOK1	PIK3R1
SMAD2	MEF2C
SPRY2	PPP2CA
HIPK2	FBXW7
RELA	BTRC
NCOA6	SRC
RELA	RFC1
NCOA3	EP300
GRB2	NTRK1
SMAD4	CTNNB1
MEF2C	EP300
NCOA6	SRF
CREBBP	MYB
ZBTB16	ESR1
ETS1	UBE2I
IRS1	PTPN1
BRCA1	TP53
CDKN1B	TSC2
ETV6	ACTA1
NCOR2	PPARD
AKT1	PIAS1
HDAC3	HSPA8
AKT1	PIAS2
EP300	MYOD1
CDK4	SETDB1
NEDD9	LCK
RB1	E2F4
JUN	ESR1
HDAC1	TGIF1
CDKN2A	TP53
DNMT1	SUV39H1
LCK	RASA1
VHL	FLNA
CBL	SPRY2
SYNCRIP	PTPN11
TGFBR1	TGFB1
HDAC1	MTA2
HDAC1	MTA1
POU2F2	GAPDH
NR3C1	SMARCA4
JUN	HIF1A
MED28	GRB2
HR	THRA
PTPN11	KIT
CREBBP	ING1
PML	SRF
HDAC1	TGIF2
MAPK1	MAP2K1
HDAC9	CTBP1
ANAPC10	SMAD2
ANAPC10	SMAD3
SMAD2	EP300
PTK2	IRS1
LCK	CBL
TP53	HIPK1
HMG20B	BRCA2
SFN	USP8
TCF4	CTNNB1
CREBBP	HIPK2
NR3C1	YWHAH
XPO1	CIITA
ERBB2	HSP90AA1
MED1	AR
MAPK8	TP53
SUMO1	TP73
TBP	RXRA
SHC1	PRKCD
HDAC1	MDM2
CBL	ZAP70
EGFR	PTPN6
TAF1	TBP
PRKCE	TIAM1
SMAD3	PML
HDAC1	DNMT1
CSF1R	GRB2
EID1	MDM2
NCK2	PDGFRB
MAPK8	DUSP1
MAP2K2	MAPK1
EPHA2	PTPN11
PTK2	JAK2
CCND1	STAT3
MAP2K2	MAPK3
NR2C2	HNF4A
PIK3CA	ARHGEF1
BAG1	SIAH1
TRIM37	TRAF2
HSP90AA1	PIM1
BMX	STAT3
TGFBR2	PIK3R1
ETV6	GAB2
RELA	HMGB1
RUNX1	AES
TRAF2	ZNF646
CHUK	NCOA3
TRIM24	GTF2E1
PTK2B	GSN
RASA1	G3BP1
SP1	RB1
NEDD9	NEDD9
RB1	EID1
LYN	GAB2
PTPN1	LTK
PIK3R1	BCAR1
ABL1	PTPN6
CEBPB	RUNX1
ETS2	ETS1
STAT3	RELA
TAF1	TP53
BIN1	XRCC5
MTA1	CHD4
MTA1	HIF1A
INSR	PRKCD
SHC1	VAV3
MAPKAPK2	AKT1
SPRY2	RAF1
CBLB	SHC1
SIAH1	SYP
SOS1	FRS2
MAPK3	LYN
KIT	GRB10
PTPN11	CBL
MAPK3	MKNK1
NCOA3	CREBBP
ERBB2IP	ERBB2IP
PLCG1	SYNCRIP
MDM4	EP300
RAF1	HSP90AA1
E2F1	NCOA6
UBE2I	DAXX
CEBPB	CEBPA
PRMT5	PRDM1
JAK2	HSPA8
TP53	PIAS1
ITK	PLCG1
KDM1	SETDB1
EP300	EP300
SMAD1	RUNX1
MAPK1	IER3
CBLB	SORBS3
SMAD1	RUNX3
SHC1	IL6ST
SMARCA2	HDAC1
STAM2	JAK1
HDAC1	EZH2
GRB2	SPRY2
YWHAB	MLLT4
MDM2	TAF1
STAM2	JAK3
STAM2	JAK2
NFKB1	RXRA
SMARCA2	HDAC2
SP1	MEF2C
BMX	PTK2
SOS2	EGFR
KAT2B	CTNNB1
RB1	PML
BTK	GTF2I
HNRNPK	SORBS3
TSG101	MDM2
ZMIZ1	TP53
MAP2K1	RAF1
CDK9	IL6ST
YWHAB	IRS2
TCF3	TAL1
HSP90AA1	MYOD1
PRKCD	PTK2B
YWHAB	IRS1
TP53	ING1
MYC	SMAD2
EGFR	EGFR
COPS5	SMAD4
ING4	TP53
SNX1	INSR
SOCS3	IGF1R
CSF1R	YES1
BTK	CBL
RAF1	LTK
SUMO1	TOP1
EPHB2	EPHB2
IKZF4	HDAC4
GSK3B	AR
IKZF4	CHD4
IKZF4	HDAC5
E2F4	RYBP
HSPA1A	BCL2
ESR1	ESR1
MCRS1	PRKAR1A
MAPK1	INSR
JUN	GTF2F2
TAL1	GATA1
MYC	SMAD3
TNFRSF1A	STAT1
CREBBP	TP53
TAL1	GATA2
IKZF4	HDAC2
FOXO1	HNF4A
CAV1	GRK5
TSG101	HGS
ZMYM2	UBTF
KRT18	PRKCE
SRC	EP300
HNRNPK	CEBPB
PTPN6	JAK1
HCK	RASA1
BUB3	BUB1B
FYN	PRKCQ
SRC	RET
HDAC9	MEF2A
XRCC5	PRKDC
ADRB2	ADRB2
SYK	PXN
VAV1	RAF1
YWHAZ	USP8
CDKN1B	CDK4
RB1	UBTF
FYN	TYK2
KIT	PLCG1
ESR1	HSP90AA1
MX1	DAXX
CRK	EGFR
RAF1	RBL2
ZBTB16	CCDC85B
DDX54	ESR1
ZAP70	GRB2
CTBP2	MDM2
VHL	NR4A1
IRS1	KHDRBS1
SRC	PLD2
PIAS3	SMAD3
SKIL	SMAD2
DAG1	FYN
GTF2H1	ESR1
MAPK1	GATA4
GHR	STAT5B
DUSP1	MAPK3
SMAD4	RBL1
NCK1	PDGFRB
PTK2	CXCR4
SKIL	SMAD3
TGFBR1	CAV1
AR	NCOA1
AR	NCOA2
GRB2	KRT8
ATR	ABL1
AR	NCOA3
HDAC2	HIF1A
HDAC1	CTBP1
BCR	PTPN6
KHDRBS2	KHDRBS1
CREBBP	GATA1
MAPK3	ETV1
NR2F2	HDAC1
MAPK1	TOB1
GRB14	PRKCZ
MAPK1	SREBF1
PXN	FYN
CREBBP	AR
RELA	CEBPB
RAC1	DOCK1
GAB1	PLCG1
GRB2	RASA1
RALA	TSC2
BCL6	BCOR
SRC	LRP1
RELA	TBP
DAG1	SHC1
PPP1R9B	CDKN2A
GAB1	PTPN11
HDAC1	VHL
ARHGAP17	RAC1
HSPA1A	CDK9
EGFR	JAK2
TRIM24	TRIM24
MAPK8	BCAR1
CRK	IRS4
NCOA6	TBP
EIF4E	EIF4E
NR3C1	HMGB1
DAG1	SRC
NR3C1	HMGB2
BCR	TP53
HDAC1	RBBP7
PEBP1	MAP2K1
DOK1	SRC
GRB10	RAF1
CCR5	STAT5B
SREBF1	CREBBP
LTK	PLCG1
PTPN6	KIT
SRC	RASA1
PLCG1	NTRK1
NCOR2	RELA
SMAD4	AKT1
SHC1	ERBB2
PRKDC	MAPK8
MTA1	RBBP7
CDK9	CDK9
HDAC3	RBL1
AR	FLNA
HGS	ATP1A1
YWHAE	IGF1R
GAB1	C1QBP
PML	TDG
GRB10	INSR
EP300	ING4
LYN	PRKDC
BTK	KHDRBS1
SHC1	AP2A2
EP300	PPARG
IGF1R	SHC1
TADA2L	NR3C1
STAT3	PTPN11
GATA1	MED1
SFN	BCAR1
CAV1	AR
PDPK1	PDPK1
GRB10	IRS1
EP300	ING1
CREBBP	SMAD1
INSR	FRS2
SHC1	MAPKAPK2
NCOA6	FOS
PLCG1	SOS2
PTK2B	TGFB1I1
DNAJA3	RASA1
MAPK14	MKNK1
BTK	FYN
KHDRBS1	LCK
ETS2	ZMYND11
CEBPB	TRIM28
SUMO1	TDG
GRB2	SOCS1
NCOA6	RELA
ATR	AP2A2
SHC1	PLCG1
PDLIM7	RET
GRB10	EGFR
EGFR	CTNNB1
PDGFRA	PDGFRA
PML	ARNT
PTPN11	GHR
CDKN1B	CDK6
RPS6KA4	FOS
PDGFRA	PDGFRB
BAG1	RAF1
CRK	PXN
CDH5	CTNNB1
LYN	CBL
TRAF2	SPRY2
HRAS	SOS1
CBL	PXN
BTRC	SMAD4
TP73	TP73
RAF1	MAP3K1
NGFR	CAV1
EGFR	PDGFRB
PRKCD	IRS1
SHB	PLCG1
TP53	MDM2
ABL1	NCK1
GRB2	PXN
MAPK14	MEF2A
CTNNB1	CHUK
TCF4	MYOD1
RUNX2	JUN
TNFRSF1B	CAV1
DOK1	ABL1
SOCS1	VAV2
KAT5	MDM2
DAG1	CSK
SOCS1	VAV1
IQGAP1	PRKACA
LEF1	SMAD3
LEF1	SMAD2
CSNK2A1	UBTF
ZAP70	PTPN6
TYK2	JAK1
LEF1	SMAD4
SELE	PXN
KDM1	WHSC1
SH3KBP1	SOS1
ITK	ITK
PTK2	CCR5
CREBBP	CSNK2A1
TGFBR2	TGFB2
TGFBR2	TGFB1
MDM2	TP73
E2F1	CREBBP
PAX5	RUNX1
STAT3	KAT5
FBXW7	MYB
PLXNB1	AKT1
SOCS3	CSF1R
AES	GTF2E1
CSNK2A1	HDAC2
FBXW7	MYC
IKZF1	CHD4
MAPK14	MAPK14
PTK2B	BCAR1
NR2C2	AR
ABL1	TP73
ABL1	NTRK1
PRMT5	TYK2
INSR	SOCS3
CSNK2A1	TOP1
HDAC2	RCOR1
PTK6	KHDRBS1
GRB2	SHC1
CRK	PTPN1
DDR2	SHC1
PXN	NCK1
NR3C1	BAG1
GSN	PIK3CA
POU2F2	ESR1
CEBPA	AR
PRKACA	CREB1
AR	CALR
RAC1	RAC1
ONECUT1	KAT2B
AR	RAN
PTK2	TSC2
RNF111	SKIL
AR	RAF1
HDAC5	HR
MEF2A	HDAC4
TRIM28	TRIM28
MEF2A	HDAC5
SMARCA2	PHB
HSPA1A	NR3C1
NR0B2	HNF4A
TRIM28	TRIM24
SUMO1	DAXX
CREBBP	EP300
BTK	CBLB
ESR1	SMARCA4
BRCA1	CCND1
LYN	NEDD9
CBLB	GRB2
AKT1	YWHAZ
PRKRA	SYNCRIP
HSP90AA1	MYC
SIAH1	UBE2I
UCHL1	UBE2I
NR4A1	HIF1A
TNFRSF1A	TNFRSF1A
ATR	BRCA2
RET	STAT3
DAXX	NR3C1
MED1	MED14
DAG1	NCK1
MAPK1	PEBP1
CALM1	IQGAP1
YWHAE	IRS1
RB1	SMARCA4
HDAC3	VHL
IRS2	PIK3R3
AKT1	NR4A1
TOPORS	UBE2I
CEBPB	RB1
JAK2	PRMT5
MAPK8	JUN
ERBB2IP	HRAS
IRS2	PIK3R1
LIFR	IL6ST
BCR	RHOA
WT1	PAWR
RAD9A	BCL2L1
PCNA	PCNA
TRIM24	AR
TDG	RXRA
LCK	PTK2B
MDM2	SFN
TP53	UBE2I
ABL1	PLCG1
HDAC1	DNMT3A
MAPK14	MAPK3
STAT1	STAT1
MAPK14	MAPK1
STAT1	STAT3
PTPN6	ROS1
RAN	XPO1
NFKB2	FBXW7
CHUK	TRAF2
CDKN2A	E4F1
AXL	PIK3R1
DAPK3	DAXX
GRB2	RACGAP1
GRB2	KRT18
GSN	PXN
PRKCZ	RELA
ARHGAP17	SRC
RB1	PPARG
NCF1	KHDRBS1
HNF4A	NCOA2
MBD3	MBD3
DNMT3B	SUMO1
NR2F2	NR2F6
HNF4A	NCOA1
SUMO1	PIAS2
VHL	HIF1A
BRCA1	E2F4
ELP2	TYK2
TRAF2	MAP3K1
TAF1	FOS
MYST2	TP53
IRS1	AKT1
GRB2	ANXA2
AKT1	MAPK14
SMAD4	SKI
TGFB1I1	PTK2
PRKCZ	TIAM1
SHC1	NGFR
CCNH	TP53
EGFR	PRKACA
CDKN1B	AKT1
PPARD	HDAC4
SP1	SRF
CBLB	ZAP70
CBL	BCR
GTF2E1	TBP
HDAC2	MXD1
PPARD	HDAC3
PIAS1	STAT1
CRK	RET
EGFR	SOCS3
EGFR	SOCS1
JAK2	PIK3R1
PIAS2	ESR1
RFC1	HDAC1
GRB2	MAP3K1
YWHAZ	PRKCD
YWHAZ	PRKCE
TRIM24	THRA
NCOA6	RXRA
YWHAZ	PRKCI
MAPK1	MAPKAPK2
ESR1	SHC1
TRIM28	NR3C1
HDAC1	CHD1
CIITA	NCOA1
PPP2CA	BCL2
HDAC1	CHD4
VAV3	EGFR
ERBB2	GRB2
JUN	JUN
YWHAE	MAP3K1
FYN	PTPN11
EGFR	PTPN11
CDC20	HDAC1
PLCG1	RHOA
PML	ZBTB16
CDC20	HDAC2
NR4A1	KAT2B
YES1	JAK2
PTPN6	STAT5B
GRB2	IRS1
USP8	GRB2
PTK2	DOCK1
HSP90AA1	NR3C1
TSC2	CAV1
VAV2	PDGFRB
ABL1	TP53
VHL	TXN
TOPORS	TP53
GTF2E1	TAF1
CRK	SH3KBP1
RXRA	PPARG
ZAP70	PAG1
HDAC5	SUV39H1
GRB2	BCAR1
CAMK2G	SMAD2
CAMK2G	SMAD4
INSR	CAV1
FYN	JAK2
SUMO1	TNFRSF1A
GRB2	GAB2
EPOR	SYP
GRB2	GAB1
SMAD2	RUNX3
AES	AR
SMAD2	RUNX1
EPOR	SYK
INSR	KHDRBS1
SMAD2	HIPK2
SMAD2	RUNX2
TOB1	SMAD1
PIK3R3	IGF1R
KHDRBS1	CRK
TOB1	SMAD4
E2F1	SP1
ERBB2	STAT3
SP100	SUMO1
E2F1	SP3
GRB2	ACTA1
ATF2	ATF2
LRP1	SHC1
CDC25B	YWHAH
NR3C1	MED1
TP53	SUMO1
JAK2	IRS1
BRCA1	ATR
YWHAH	PIK3CA
MAPK1	TSC2
MAPK3	MAP2K1
PTK2	GAPDH
IGF1R	PTK2
RAD9A	BCL2
PTPN6	SYK
MYC	MED14
DOCK1	BCAR1
HDAC2	CDYL
PML	JUN
CREBBP	RBBP7
PTPN1	EGFR
YWHAB	USP8
HNRNPK	HMGB1
FOS	CSNK2A1
CDC25B	YWHAB
HDAC5	GATA1
CRK	EPHB2
EP300	HIF1A
MDM2	COPS5
RUNX1	FOS
PECAM1	CTNNB1
EPHA2	GRB2
HDAC1	PML
FYN	RAF1
VAV1	MAP2K1
SHC1	EPOR
PRKAR1A	PRKACA
AR	HSP90AA1
SHC1	PAG1
HMG20B	RCOR1
TP53	AURKA
MAPK14	ETV1
HRAS	RASGRF1
HDAC1	RUNX1T1
SNX1	EGFR
IRS2	JAK1
SRC	GAB2
TBP	ESR1
MYC	GTF2I
BRCA1	JUN
NR3C1	JUN
SAP30	RBBP7
GRB10	GHR
SMAD3	DVL1
PRKCQ	TAL1
BRCA1	HDAC2
BRCA1	HDAC1
DAG1	CAV1
USP8	STAM
CHUK	CHUK
SELE	PTK2
TOPORS	TOP1
CAV1	BTK
CREBBP	STAT1
SMAD3	FOS
NCOA3	CCND1
CREBBP	STAT3
BRCA1	SP1
TCF3	TCF3
NCOA1	STAT3
LEF1	EP300
TGFB1I1	PXN
RB1	RBL2
RB1	RBL1
GRAP2	SOS2
RBL1	KDM5A
SOS1	BCR
NFKB2	NFKB2
JUN	ETS1
NONO	MAD1L1
PPP2CA	CDK6
RNF111	SMAD3
KDM1	RCOR1
CCND1	RFC1
RNF111	SMAD6
SHC1	DOK1
SNX1	ACVR1B
PCNA	XRCC5
GRB2	VAV2
RHEB	HRAS
NTRK1	NTRK1
BRCA1	GTF2E1
GRB2	VAV3
ATR	E4F1
CTBP2	TGIF1
PLD2	PRKCD
STAT3	NFKB1
RNF111	SMAD2
CDC25B	AR
KHDRBS1	RASA1
BAG1	AR
MAPK14	DUSP1
BLM	RFC1
SP1	MYC
MAPK14	DUSP6
MYC	MAPK1
YWHAE	GRAP2
RB1	AR
MYC	MAPK3
MDM4	SMAD4
SH3KBP1	KIT
RAF1	AKT1
MDM4	SMAD3
SRF	GTF2I
NEDD4L	NR3C1
TP53	TSG101
RUNX1	JUN
CCND1	PCNA
CCND1	CDK4
MAPK14	KRT8
CUL1	BTRC
HIF1A	STAT3
KHDRBS1	SRC
TGFB2	DAXX
GATA2	PML
KIT	JAK2
SKAP1	SKAP1
SMAD2	SMAD6
SMAD3	DAB2
DAXX	RASSF1
ESR1	SMAD2
YWHAB	RACGAP1
CBL	SYK
JUN	SKI
PTPN11	SELE
COPS5	JUN
STAM2	HGS
GH1	BTRC
CRK	XPO1
PIAS4	LEF1
STAM	HGS
CBLB	KIT
CCND1	TSC2
PTK2	BIN1
HIF1A	NCOA1
NR2F6	ESR1
IL2RB	GRB2
PRKCD	PTPN6
NCOA2	CCNT1
NCOA6	CEBPA
ESR1	MDM2
GAB2	AKT1
NCK1	SOCS1
EGFR	CAV1
SREBF1	UBE2I
HDAC1	SPI1
PXN	PTK2B
NCK1	KHDRBS1
UBE2I	TOP1
SRC	SKAP1
HDAC2	FOXP3
ZAP70	FYN
SFN	RACGAP1
CALM1	TCF4
NCOA6	EP300
HDAC3	NCOR2
RAF1	PHB
CALM1	TCF3
NR0B2	AR
PIK3CA	HRAS
CDKN1B	UCHL1
IKZF3	CHD4
KDM5C	KDM5C
RBL1	PHB
NR3C1	ONECUT1
BRCA2	BUB1B
GRB2	PRKAR1A
JAK2	GRB2
HSP90AA1	STAT3
SMAD2	SKI
PTK2	YES1
HIPK2	SMAD1
SFN	BRAF
ABL1	GRB2
ERBB3	PTK6
IRS1	IGF1R
BCL2	BCL2L1
MDM2	GTF2E1
MYC	CEBPB
SOS1	FYN
JUN	ATF2
MYC	CEBPA
TIAM1	RAC1
SRF	SRC
PTEN	UBE2I
HGS	TUBB
RAF1	JAK2
TP53	EP300
RHOA	GNA12
EPOR	PIK3R1
MAF	CREBBP
MCRS1	CCDC85B
PPARG	NCOA4
CREBBP	BRCA1
SMAD2	INSR
HDAC9	HDAC4
GATA1	MED14
GATA2	HDAC5
HDAC9	HDAC1
IKZF1	TBP
KRT18	KRT8
HDAC9	HDAC3
CCND1	TAF1
SMAD3	SKI
SHB	VAV1
ING2	SAP30
PPARG	NCOA2
PPARG	NCOA3
PML	SMAD2
BCAR1	PXN
PRMT5	PRMT5
UBE2I	TDG
IKZF1	NCOR2
JAK2	VAV1
ARHGEF1	HRAS
ARRB1	CSNK2A1
PCNA	HDAC1
PDGFRB	PLCG1
FOS	GTF2F2
CCNT1	PML
ERBB2	EGFR
NR2C2	HDAC4
NR2C2	HDAC3
GRB2	DRD3
MEF2A	SMAD2
ARHGAP17	BTK
PDGFRB	SHC1
KAT5	AR
NCOA1	CREBBP
HTT	CREBBP
BCAR1	PTPN11
FLNA	RALA
GRB2	HTT
HDAC2	HIF1AN
SUMO1	UBE2I
KHDRBS2	HNRNPA1
PA2G4	HDAC2
MAPK8	MAP3K1
PRKRA	PRKRA
NCOA6	NFKB1
SP1	ARNT
EP300	SMAD4
NONO	NONO
SYP	GRB2
PAX3	MSX1
EP300	SMAD1
INSR	INPPL1
SHC1	GHR
ING1	KAT2B
CRK	SOCS1
TP53	HDAC1
CBL	PDGFRA
BCR	RAC1
RHEB	RAF1
CTNNB1	SMARCA4
CCR5	ARRB1
NR3C1	TXN
CTBP1	ZEB1
GHR	TYK2
NFKB1	BTRC
SIAH2	PIAS2
CDKN2A	DAXX
MAPKAPK2	ETV1
SIAH2	PIAS3
MBD3	GATAD2B
UBE2I	TP73
TRIM24	RARA
SRC	FYN
TRIM24	PML
PTK2	PTK2
ZBTB16	NR3C1
KIT	STAT1
TBP	TP53
APP	CAV1
HNRNPA1	SYNCRIP
ESR1	NCOA2
JAK1	STAT3
ESR1	NCOA1
ABL1	INPPL1
ING4	RELA
SP1	AR
ARNT	SRC
BRCA1	JAK1
DNMT1	PCNA
IL2RB	STAT3
AR	TSG101
GATA2	ZBTB16
IKZF3	HRAS
GRB2	HCLS1
PLCG1	KHDRBS1
GTF2I	STAT3
IL2RB	STAT1
CCND1	AR
BRCA1	JAK2
ETV6	GRB2
GATAD2B	MTA2
SUV39H1	RBBP7
SMAD2	SP1
UBE2I	UBE2I
TGFBR1	MAPK14
SRC	PTK2B
JAK3	STAT5A
PLD2	PLCG1
BRCA2	TP53
JAK3	STAT5B
RARA	RARA
JAK2	PTK2B
GTF2I	STAT1
HNRNPA1	HNRNPA1
GRB2	TNFRSF1A
BRCA1	STAT1
SMAD1	SNIP1
PDGFRB	PIK3R1
YWHAB	RAF1
HDAC2	ATR
PHB	TP53
HRAS	RASSF1
HDAC1	BCL6
DAXX	SLC2A4
TP53	PTEN
AR	HNF4A
NEDD9	CRK
ABL1	HCK
HDAC1	HDAC1
FRS2	RET
NCOA4	ESR1
ATR	PA2G4
PTK2B	RASA1
SFN	PARD3B
SMARCA2	SMARCC1
GRB2	PDGFRB
LYN	BCAR1
VAV1	SYK
DAPK3	GRB14
NR2C1	ESR1
FOXO1	CEBPB
NR2C2	ESR1
HCFC1	HDAC1
BCL2	IRS2
HCFC1	HDAC2
HDAC1	GTF2I
MAPK3	INSR
BCL2	IRS1
MAPK8	IRS1
XRCC5	TOP2A
PRKCD	STAT1
MAD1L1	HDAC1
MDM4	CDKN2A
MAD1L1	HDAC2
DVL2	SNIP1
MAPK1	KRT8
TGFBR1	TGFBR2
MYC	KAT5
ATR	HDAC1
ZMYND11	TP53
SNX6	SNX1
SNX6	SNX2
PIK3C2B	GRB2
MYOD1	NR2F2
SNX6	SNX4
SRC	ADRBK1
CEBPA	NR3C1
DGKZ	VHL
GAB2	PIK3R1
CREBBP	FOXO4
SNX6	INSR
TP53	MTA2
UBE2I	HGS
TP53	MTA1
ERBB3	PIK3R1
DAB2	SRC
PRKCZ	PDPK1
UBE2I	HIPK2
ATR	MTA2
RHOA	VAV3
DOK1	RASA1
ATR	ATR
ATR	MTA1
PHC2	PHC2
MLLT4	SORBS1
DOCK1	CRK
STAM2	EPS15
HGS	APP
HNF4A	MED1
ATF2	MAPK14
PPP1R8	SETDB1
BUB1	CRK
GAPDH	AR
HIF1AN	HIF1A
CDK4	PCNA
BCR	KIT
STAT3	JUN
HDAC1	PHF21A
JAK1	STAT5B
JAK1	STAT5A
IRS4	PIK3CA
SMARCA4	CREBBP
PTPN11	PTPN11
PTK2B	LYN
TRADD	STAT1
HTT	EGFR
PML	RELA
SP1	TAL1
KAT5	KAT5
RB1	HDAC3
RB1	HDAC2
CREBBP	ONECUT1
PPP1R8	HDAC2
SMAD1	SKI
PTPN6	PIK3R1
RXRA	HDAC3
IGF1R	GRB10
TGFB2	TGFB1
ATF2	UBE2I
RXRA	HDAC4
RXRA	TRIM24
SYK	PAG1
SOS1	PLCG1
PRKCD	GNA12
SMAD3	JUN
HGS	EPS15
PML	TP53
SKAP1	GRB2
MAPK1	PRKCE
HMG20B	HDAC1
PHB	RBL2
BLM	TP53
HMG20B	HDAC2
NCOR2	ZBTB16
VAV1	CBL
NFKB1	RELA
SP3	PIAS1
SMAD4	PARD3B
PTEN	ESR1
RB1	ARNT
CEBPB	NR3C1
RB1	MDM2
CDKN2A	CDK6
MX1	SUMO1
PRMT5	JAK1
FLNA	DRD3
PRMT5	JAK3
MYC	KAT2B
RASSF1	RASSF1
PTPN11	CTNNB1
EZH2	CCDC85B
BMX	SRC
FOXP3	HDAC9
NCOR2	AR
DDX54	NR3C1
GRB14	PDGFRB
SIAH2	SYP
KAT5	CREB1
MAPK1	DUSP1
MYOD1	TCF3
PPP2CA	PRKCD
MYC	SMARCA4
KHDRBS2	PRMT5
SMAD2	AKT1
MX1	SP100
MAPKAPK2	MAPK14
PTPN11	CDH5
UBE2I	DNMT3A
AR	HDAC3
AR	HDAC4
SMAD3	ERBB2IP
KAT5	FOXP3
HNRNPK	CSK
CBLB	SYK
PLCG1	VAV1
AR	HDAC1
NCOA6	ESR1
ERBB2	CTNNB1
RAD9A	ABL1
ATF2	CSNK2A1
MAPK14	EGFR
MDM4	TP53
BRCA1	BLM
DOK1	PLCG1
EP300	BRCA1
TGIF1	SMAD1
MCRS1	DAXX
NCOA4	KAT2B
TGIF1	SMAD3
NR4A1	PML
SYK	PTK2B
PCNA	EP300
DVL2	SORBS3
ETV6	ETV6
SNX6	TGFBR2
SHB	PIK3R1
SNX6	TGFBR1
HTT	RASA1
NTRK1	SH2B1
VHL	HIF1AN
PDPK1	AKT1
GATA1	SMARCC1
HCFC1	RBBP7
INSR	GRB2
HDAC1	SAP30
SOS1	CRK
CDK6	CCND1
CDK6	CCND2
AXL	GRB2
RB1	HMGB1
CDC20	AURKA
BUB1B	CDC16
SPI1	ETS2
SPI1	ETS1
CTBP1	IKZF1
CDC16	CDC27
MYC	RELA
HDAC3	HIF1A
TNFRSF1B	TNFRSF1B
MAPK8	SPI1
UBR5	MAPK1
FYN	SKAP1
NEDD4L	NEDD4L
STAT5A	JAK2
CALM1	AR
RAD9A	HDAC1
GAB2	SHC1
PLCG1	GAB2
UBR5	MAPK3
GATA2	JUN
HRAS	TIAM1
IGF1R	RASA1
SRF	NCOR2
HSP90AA1	HSPA1A
AR	SMAD3
AR	SMAD4
JUN	NCOR2
PIK3R3	PIK3CA
COPS5	UCHL1
TRIM24	ESR1
RB1	MYC
NEDD9	SMAD3
VAV1	PTPN6
PAX5	DAXX
BUB1B	HDAC1
PRKACA	CAV1
PTPN6	EPOR
TSG101	EP300
MSX1	TBP
ING1	SMARCC1
NCF1	NCF1
MDM2	MDM4
ATF2	MAPK8
MDM2	MDM2
IRS2	UBTF
YWHAE	TOP2A
DVL1	DVL1
ARHGAP17	ABL1
CSK	INSR
HMG20B	CCDC85B
LYN	CSF1R
MYC	TIAM1
ING2	SMARCC1
SNX2	INSR
HDAC3	CTBP1
IL6ST	ERBB3
DAB2	CSK
THRA	MED1
NCOA6	NR3C1
BCR	RB1
ABL1	PRKDC
SH3KBP1	PDGFRB
BAG1	HSPA8
SNX6	ACVRL1
MAPK14	CSNK2A1
MED1	ESR1
EGFR	HGS
GATA1	SMARCA4
COPS5	TP53
BUB1B	CDC27
NR3C1	HSPD1
HRAS	MLLT4
YWHAZ	RAF1
SYT9	SYNCRIP
CDC25B	KAT2B
SMAD2	DAB2
PIAS1	SIAH2
BTRC	GHR
SNX2	PDGFRA
ABL1	MICAL1
SNX2	PDGFRB
POU1F1	PPARG
AURKA	BRCA1
ING1	SMARCA4
RALA	HRAS
PML	MYB
PRKRA	RB1
PTK2B	GRB2
ITK	FYN
HIPK1	DAXX
FYN	SOCS1
SPI1	FOS
IL2RB	STAT5A
PECAM1	PECAM1
PTK2	SYK
SMAD2	CDC16
ARNT	GTF2F2
IL2RB	STAT5B
RHOA	TNFRSF1A
SMAD3	KDM5C
GNA12	HSP90AA1
CBL	CBL
VAV1	JUN
HDAC9	ETV6
MEF2A	EP300
HDAC3	DAXX
HDAC2	HDAC2
HDAC2	HDAC1
SUMO1	HIPK2
AR	UBE2I
TP53	HTT
STAT3	MYOD1
EPHB2	PLCG1
HINFP	HDAC1
CDKN1B	TRAF2
AR	AR
SOS1	EGFR
IKZF2	HDAC4
PTK2	GRB2
NR3C1	RELA
IKZF2	HDAC2
BRCA1	AKT1
AR	MDM2
TP73	RB1
RXRA	NR2F6
MAPK1	RPS6KA1
IKZF2	HDAC5
PRKCD	TIAM1
PIAS3	RELA
BRAF	RAF1
JAK1	RAF1
ING1	RBBP7
JUN	TAF1
ETS1	MAF
INSR	SHC1
GRB2	GRB2
MYC	TADA2L
MAPK1	AR
GAB2	PTPN11
HSP90AA1	ARNT
PTEN	CSNK2A1
CSK	TGFB1I1
ESR1	MAPK1
GTF2H1	CDK7
CDK9	HNRNPA1
MAPK1	ATF2
CSF1R	SOCS1
VAV1	ZAP70
MBD3	HDAC2
THRA	HDAC3
MBD3	HDAC1
BCOR	HDAC3
CSK	PXN
BCOR	HDAC4
EPHB2	BCL2
BCOR	HDAC1
UBE2I	MAP3K1
ACVRL1	TGFB1
HNRNPA1	CCNT1
NCK2	PTK2
PTPN1	NTRK1
TAL1	EP300
WHSC1	WHSC1
C1QBP	PRKCZ
ESR1	FOXO1
SP1	HTT
SMAD4	ERBB2IP
RAC1	VAV3
HIPK3	SUMO1
ADRB2	ADRBK1
RAC1	VAV1
ESR1	FOXO4
SMAD4	SMAD2
SMAD4	SMAD1
TOB1	SETDB1
RUNX1T1	RUNX1T1
PIAS4	SMAD6
AR	JUN
C1QBP	PRKCD
DOK1	YES1
HDAC4	BCL6
SFN	CSNK2A1
CDK4	LYN
MXD1	SAP30
TCF3	CBFA2T3
PHF21A	KDM1
HDAC4	GATA1
TP53	HIF1A
GRB2	CBL
MX1	PIAS1
KAT5	LRP1
MAP3K1	MAP2K1
ETS1	RUNX2
PIAS4	SMAD4
ARHGAP17	GRB2
SNX4	PDGFRA
PIAS4	SMAD3
SNX4	PDGFRB
PIAS4	SMAD2
ARHGEF1	ARHGEF1
FYN	VAV1
MAP2K1	MAP2K1
SOCS1	FLT3
CDK9	HSPD1
SMAD2	NEDD9
TDG	RARA
BRCA1	DNAJA3
RB1	ATF2
LYN	PPP1R8
PTK2	CRK
NFKB1	HDAC1
SIAH1	SIAH1
CBL	SH3KBP1
CRK	SHB
IRS1	SOCS1
YWHAZ	TP53
CRK	CBL
CBL	INPPL1
BCL6	ZBTB16
RHOA	MAPK8
SMAD4	SMAD3
MET	CTNNB1
EPHB2	YES1
SMAD4	SMAD6
SNX6	EGFR
MYB	PAX5
SREBF1	NR0B1
JAK2	EPOR
PTEN	AR
SKI	SKI
SMAD1	DVL1
PIK3R1	PIK3R1
YWHAZ	BRAF
DVL2	DVL2
SIAH1	VAV1
EPHB2	ABL1
KRT18	HGS
PLCG1	RASA1
NONO	SPI1
ERBB3	PA2G4
KIT	YES1
CTBP1	KAT2B
ATF2	FOS
FGFR1	PLCG1
SHB	JAK3
PECAM1	PIK3R1
ARHGAP17	LCK
MPZL1	PTPN11
SHB	JAK1
SATB1	CHD4
SMAD2	CDC27
SNX2	ACVR1B
NR0B2	THRA
TOP2A	HDAC1
GSK3B	NFKB1
PPP2CA	PXN
SH3KBP1	SH3KBP1
SHC1	PTK2
YES1	PECAM1
HIPK2	TRADD
CDK4	CDKN2A
TCF4	TAL1
UBE2I	CHUK
BRCA1	STAT5A
TAF1	RBL1
TAF1	RBL2
GRAP2	CSF1R
GAPDH	TXN
EPS15	AP2A2
NCOA3	NCOA2
VAV1	PDGFRB
TYK2	TYK2
PIAS2	AR
NCK1	SOS1
TP53	TOP2B
CAV1	SRC
TP53	TOP2A
ESR1	EP300
NCOR2	SAP30
HDAC2	TOP2B
NFKB2	SUMO1
HDAC2	TOP2A
RUNX2	HDAC3
AXL	SRC
IKZF1	HDAC5
IKZF1	HDAC4
CEBPA	SPI1
KAT2B	CREBBP
HDAC1	CDYL
NR3C1	STAT3
SUMO1	SUMO1
IKZF1	HDAC2
BRAF	YWHAB
MCRS1	UBR5
HTT	CTBP1
KHDRBS1	CREBBP
BCAR1	INPPL1
IKZF1	IKZF4
BCL2	MYC
SHC1	PIK3R1
HIF1A	CREBBP
HDAC3	SKI
CREBBP	TDG
SKI	HIPK2
ESR1	CAV1
JAK1	BTK
HDAC5	TBL1X
HNRNPK	GRAP2
CTBP1	TBP
RELA	CREBBP
SKIL	SKIL
NR3C1	RAF1
SPI1	ETV1
PTPN6	TYK2
SNIP1	EP300
MYB	CEBPB
CRK	MICAL1
RB1	RBBP7
ARRB1	CSK
ITK	CBL
SFN	NEDD4L
JAK2	STAT3
COPS5	CUL1
HDAC1	MYOD1
CTBP2	ZEB1
PTK2B	PTPN6
SMARCA4	HDAC2
SHC1	IRS1
AR	TGFB1I1
DNMT3B	TDG
NR3C1	NCOR2
CDK7	ESR1
MTA2	CHD4
POU2F2	POU2F2
NCOR2	SMARCA4
TNFRSF1B	KRT18
PRKCZ	AKT1
TBP	HMGB1
CSNK2A1	CDC25B
NCOA4	NR3C1
USP7	TRAF2
MXD1	HDAC1
MTA2	TOP2B
CTNNB1	AR
FYN	PAG1
USP7	MDM2
SOCS1	IGF1R
MYC	BRCA1
TNFSF11	SRC
PTPN6	INSR
VAV1	RACGAP1
ESR1	BAG1
ZMYND11	SMARCA2
TGFB1I1	NR3C1
RARA	HDAC3
PTGS2	CAV1
RARA	HDAC4
ESR1	STAT3
AR	PSPC1
PPP1R9B	TIAM1
TNFRSF1A	JAK2
HDAC1	ZBTB16
POU1F1	NR3C1
ATF2	CEBPA
BRCA2	SMAD2
BRCA2	SMAD3
TNFRSF1A	JAK1
IL6ST	TYK2
SRF	RELA
FYN	TOM1L1
GAB1	PIK3R1
CDK9	RB1
MYC	DNMT3A
GH1	GHR
SMAD3	FOXO1
SMAD3	FOXO4
SMAD3	AKT1
MAD1L1	MAD1L1
TSC2	FOXO1
RPS6KA4	CREB1
AR	PIAS1
HNF4A	CREBBP
AR	PIAS4
AR	PIAS3
FOXO1	CREBBP
TP53	HSPA8
SOS1	PTPN6
SFN	TP53
EGFR	SRC
PLD2	GAPDH
GRB2	FLT3
ETS2	FOS
GRB2	GHR
PTEN	PXN
HDAC3	GATA2
BRCA1	CDK4
MAPK3	JUN
MDM2	CTBP1
HDAC5	CTBP1
UBE2I	IKZF1
SMARCA4	RFC1
UBE2I	IKZF3
PHF21A	HDAC2
SMAD2	JUN
HTT	AP2A2
IL6ST	PTPN11
CREBBP	JUN
RB1	RAF1
YWHAB	HDAC4
HDAC1	SATB1
CBL	YWHAB
ROS1	PTPN11
PML	FOS
CDKN2A	CCND2
HSPA1A	BAG1
CDKN2A	CCND1
AES	HMGB1
EGFR	STAT1
EGFR	STAT3
SMAD3	RBL1
BCAR1	LCK
LCK	SKAP1
MKNK1	EIF4E
BCR	MLLT4
VAV1	PAG1
RXRA	MYOD1
GRB2	PAG1
SRC	EPHB2
BCAR1	HCK
PTK2	EGFR
HDAC3	JUN
JAK2	PTPN6
SHC1	SOS1
AP2A2	DAB2
SMAD3	E2F4
ARID4B	HDAC1
ARID4B	HDAC2
SMARCA4	SMARCC1
BIN1	BIN1
SMAD2	SNIP1
CBL	YWHAZ
TBP	TBP
CTNNB1	PIK3R1
PRKCE	GNA12
SHB	FGFR1
SORBS3	MAPK1
UBE2I	PIAS1
CDK9	RELA
SUV39H1	RB1
UBE2I	PIAS2
PXN	NEDD9
TBP	NR3C1
CXCR4	PTPN6
PIK3R1	HRAS
E2F1	RB1
HDAC1	PPARD
PEBP1	RAF1
STAT1	JUN
SMAD3	BTRC
JAK2	DNAJA3
ZMYM2	HDAC1
RARA	ZBTB16
ZMYM2	HDAC2
SRC	GRB2
SRC	SYK
CEBPB	SMARCC1
PPARG	MED1
CBLB	VAV1
SMAD3	CEBPB
SMAD3	CEBPA
NR4A1	NCOA3
PTPN11	SOCS3
SIAH2	UBE2I
PHC2	MCRS1
TYK2	XRCC5
SP1	SMARCC1
RELA	HDAC3
RELA	HDAC2
PIAS2	MYC
RELA	HDAC1
NR4A1	NCOA1
PLCG1	SELE
ZEB1	SMAD1
HSP90AA1	CSNK2A1
POU2F2	AR
SOCS3	NONO
ZEB1	SMAD2
PCNA	PRKDC
EP300	PIAS3
RUNX1	ETS1
ZEB1	SMAD3
RAF1	YWHAE
MAPK3	SREBF1
HSP90AA1	HIF1A
BMX	CAV1
LYN	HCLS1
ZMYM2	RCOR1
HDAC4	YWHAE
MCRS1	MED4
BTRC	PRKACA
TBP	PAX3
IL6ST	PTPN6
UBE2I	PML
RAF1	YWHAH
HCK	IL6ST
PTK2B	ERBB2
BCR	GRB2
EGFR	CSK
NR2F6	NR3C1
RXRA	SP1
PTK2	PIK3R1
SYK	LYN
NR3C1	TSG101
TDG	TP53
CSK	RASA1
MYC	RAF1
STAT5A	ESR1
NCOA6	NCOR2
RB1	BAG1
IL6ST	GRB2
NFKB2	BTRC
HDAC2	CBFA2T3
HDAC4	FOXP3
SMAD4	FOXO4
SHB	SRC
RB1	PA2G4
SRC	FOXO1
CCND1	HDAC3
GRB2	SOS2
BRCA1	NCOA2
TP53	USP7
DOK1	LYN
SP1	SMARCA4
ING2	HDAC1
INSR	JAK2
ING2	HDAC2
BRCA1	NCOA3
SORBS1	PTK2B
RAF1	PDGFRB
ERBB2	ERBB2
ERBB2	ERBB3
YWHAZ	CDC25B
TOP2B	HDAC1
ARNT	HIF1A
SMAD4	PIAS3
SPI1	JUN
RAF1	PRKCZ
STAT5A	MAPK1
USP8	STAM2
SOCS3	EPOR
NCOA6	CREBBP
TDG	TP73
DAPK3	PRKCZ
SKI	SKIL
DAB2	LRP1
BIN1	SNX4
NR3C1	CALR
BCAR1	YWHAZ
ATF2	NCOA6
DTX1	DTX1
ELP2	STAT3
GRB2	MICAL1
ELP2	STAT1
LCK	SYK
PSPC1	NONO
SP1	MYOD1
SRF	CEBPB
JAK2	SOCS3
FYN	CTNNB1
JAK2	SOCS1
NCOA3	NR0B2
[truncated: 887 more rows]
